# 1 DLITE uses cell-cell interface movement to better infer cell-cell 2 tensions

3 R. Vasan<sup>1</sup>, M.M. Maleckar<sup>2</sup>, C.D. Williams <sup>\*2</sup> and P. Rangamani<sup>†1</sup>

4 <sup>1</sup>Department of Mechanical and Aerospace Engineering, University of California San  
5 Diego, San Diego, CA, 92093-0411

6 <sup>2</sup>Allen Institute for Cell Science, Seattle, WA, 98109

7 April 29, 2019

## 8 **Abstract**

9 Cell shapes and connectivities evolve over time as colony shapes change or embryos develop.  
10 Shapes of intercellular interfaces are closely coupled with the forces resulting from actomyosin  
11 interactions, membrane tension, or cell-cell adhesion. While it is possible to computationally in-  
12 fer cell-cell forces from a mechanical model of collective cell behavior, doing so for temporally  
13 evolving forces in a manner that is robust to digitization difficulties is challenging. Here, we in-  
14 troduce a method for Dynamic Local Intercellular Tension Estimation (DLITE) that infers such  
15 temporal force evolutions with less sensitivity to digitization ambiguities or errors. This method  
16 builds upon prior work on single time points (CellFIT). We validate our method using synthetic  
17 geometries. DLITE's inferred cell colony tension evolutions correlate better with ground truth  
18 for these synthetic geometries than tension values inferred from methods that consider each time  
19 point in isolation. We introduce cell connectivity errors, angle estimate errors, connection mislo-  
20 calization, and connection topological changes to synthetic data and show that DLITE has reduced  
21 sensitivity to these conditions. Finally, we apply DLITE to time series of human induced pluripo-  
22 tent stem (hiPS) cell colonies with endogenously expressed GFP-tagged ZO-1. We find major  
23 topological changes in cell connectivity, e.g. mitosis, can result in an increase in tension. This  
24 supports a correlation between the dynamics of cell-cell forces and colony rearrangement.

---

\*cdavew@alleninstitute.org

†prangamani@ucsd.edu

## Dynamic tension estimation

---

25     **Keywords** hIPSc, Force, Tension, ZO-1, Cell Colony

26

### **Significance statement**

27

Cell-cell tensions play an important role in the dynamics of tissue morphogenesis. Mathematical modeling tools have helped understand the role of cell-substrate and cell-cell adhesion in tissue organization. In particular, recent modeling studies have shown that an inferential approach without a constitutive equation can estimate distribution of tensions in a single image of a cell monolayer (CellFIT). Here, we include the dynamics of monolayer morphogenesis in the estimation of cell-cell tensions. Such a formulation, termed DLITE, performs better across time in both synthetic geometries and time series of hIPS cell colonies with endogenously expressed GFP-tagged-ZO-1. We also show that DLITE is robust to digitization ambiguities during segmentation. Such a method can shed some light on physical mechanisms that drive morphogenesis.

## 28 **Introduction**

29 Cell shape, forces, and function are closely related [1, 2, 3, 4]. Cell shape affects the organization  
30 and transmission of cytoskeletal forces and the structures that create them [5, 6, 7]. Cell membrane  
31 tension partially governs processes from intracellular endocytic bud morphology during trafficking  
32 [8] to tissue level remodeling events such as wound healing [9], development [10], expansion [11],  
33 migration [12, 13] and cancer invasion [14]. Mechanical rearrangement occurs as cells transmit these  
34 forces across the membrane [15] and cell-cell adhesion complexes such as adherens and tight junctions  
35 [16, 17]. These apical cortical complexes [18] depend on the activity of the actomyosin cytoskeleton  
36 [19, 20]. The mechanotransduction of intercellular forces can alter and regulate biochemical signalling  
37 pathways [21, 22] with force and deformation at a particular time point partially regulating future force  
38 and deformation.

39 Force-mediated collective behaviours are crucial for the dynamics of tissue reshaping. This is  
40 commonly evidenced by apoptosis in cell cultures or by the intercalation and extrusion of cells during  
41 development [23, 24]. We can examine the role of tension in tissue remodeling using direct force mea-  
42 surement techniques such as atomic force microscopy (AFM) or micro-pipette aspiration [25, 26, 27].  
43 These direct measurement techniques offer precise force characterization in cells and tissues but per-  
44 turb the actomyosin network [28, 29]. As a result, these methods can alter the force responses of the  
45 system at subsequent time points. Alternative optical measurement techniques that use Förster Res-  
46 onance Energy Transfer (FRET) tension probes or traction force microscopy (TFM) can assay force  
47 [30, 31, 32] without the mechanical disruption associated with direct measurements [33]. These op-  
48 tical approaches can be applied across extended periods but, like the prior physical techniques, they  
49 can be difficult to implement in a high-throughput context. Each of these measurement techniques has  
50 its distinct set of advantages, depending on the biological problems being studied. Complementary  
51 to these approaches, force inference from the geometry of the cell boundary can allow for the esti-  
52 mation of normalized tensions solely from images of labeled confluent cells without further condition  
53 requirements.

54 Intercellular forces can be inferred at cell-cell interfaces using a mechanical model predicated on  
55 the assumption that forces are balanced where multiple cell-cell interfaces meet [34, 35, 36]. These  
56 mechanical models cover a range of complexities, assumptions, and use cases [37]. Here we deal  
57 with the subset devoted to the representation of tensions in a two-dimensional plane of curved edges

## Dynamic tension estimation

---

58 digitized from the apical interfaces of a confluent cell colony (Fig. 1A,B). We build upon prior rep-  
59 resentations of this system, notably that used in the Cellular Force Inference Toolkit (CellFIT) [34],  
60 and develop an alternate problem formulation that treats tension estimation as a temporally evol-  
61 ing problem, borrowing information from prior time points to increase model prediction stability and  
62 boost resistance to ambiguities or errors that arise during the digitization process (Fig. 1C). This pro-  
63 vides a non-disruptive means to infer intercellular forces in time-lapse imaging of cell colonies. We  
64 term this technique Dynamic Local Intercellular Tension Estimation, or DLITE. Here, we validate  
65 DLITE against a range of synthetic data, for which known tension ground truths are available, and  
66 use it to predict tensions in time series of human induced pluripotent stem (hIPS) cell lines with the  
67 endogenously GFP-labeled tight junction protein ZO-1.

## 68 **Methods**

### 69 **Assumptions**

70 We employed a curvilinear description of a tissue by defining a colony as a directed planar graph  
71 comprising cells ( $c$ ), edges ( $e$ ) and nodes ( $n$ ) (Fig. 1B, for more details see SOM and [38, 34]). Forces  
72 exerted by the actomyosin cortex result in tangential stresses in the form of tension ( $t$ ) along an edge.  
73 Cells resist deformation by means of a normal stress exerted as pressure ( $p$ ) inside every cell. Along  
74 each edge, we assumed that the interfacial tensions are constant and that the intracellular pressures  
75 are uniform within a cell. At the length scale of the whole cell, we ignored membrane bending and  
76 assumed that edge tensions and cell pressures exclusively govern cell shape. We treated viscous forces  
77 as negligible and therefore assumed that the colony shape is quasi-static, i.e. at each time point the  
78 colony is in mechanical equilibrium.

### 79 **Governing equations and system specification**

80 A general force balance at every node in a colony can be written as

$$n_{\text{residual}} = \underbrace{\left| \sum_{i=1}^{e_n} t_i v_i \right|}_{\text{(Tension balance per node)}}, \quad (1)$$

81 where  $n$  is a node,  $t$ , and  $v$  represent the tension/tangential stress and local tangent unit vector of an

## Dynamic tension estimation

82 edge connected to node  $n$  respectively,  $e_n$  is the number of edges connected to node  $n$  and  $n_{\text{residual}}$  is  
 83 the magnitude of the resultant tension vector coming into a node (ideally 0). This notation is shown  
 84 in Fig. 1B. This equation applies when employing a curvilinear description of tissue and applies to a  
 85 node that is both connected to at least three edges and is in mechanical equilibrium [34]. The pressure  
 86 difference between adjacent cells can be estimated using Laplace's law as

$$e_{\text{residual}} = \underbrace{p_i - p_j - \frac{t}{r}}_{\text{(Pressure balance per edge)}}, \quad (2)$$

87 where  $e$  is an edge,  $p_i$  and  $p_j$  are the pressure of adjacent cells  $i$  and  $j$  respectively and  $e_{\text{residual}}$  is  
 88 the residual error from the pressure balance. Here,  $t$  and  $r$  represent the tension and radius of the  
 89 interfacial edge  $e$ . The system of equations for tension and pressure are generally overdetermined;  
 90 there is no unique solution to this system [34]. Therefore, we can only infer the relative distribution  
 91 of tensions from the shape of the edges and not the absolute values.

92 To compute the dynamics of cell-cell forces, we reformulated the tension balance (Eq. 1) as a local  
 93 optimization problem defined as

$$\underset{t}{\text{minimize}} \quad f(t) = \sum_{j=1}^N \left( n_{j,\text{residual}} + \underbrace{\frac{n_{j,\text{residual}}}{\sum_{i=1}^{e_{n_j}} |t_i v_i|}}_{\text{Regularizer}} \right), \quad (3)$$

94 where  $n_j$  and  $e_{n_j}$  represent the  $j^{\text{th}}$  node and the number of edges connected to node  $n_j$ , and  $N$  is the  
 95 total number of nodes in the colony. Here,  $n_{j,\text{residual}}$  is the tension residual at a given node (Eq. 1)  
 96 and the regularizer is the magnitude of the tension residual divided by the sum of the magnitude of the  
 97 tension vectors acting on that node. Since tension cannot be negative, we set a lower tension bound  
 98 of zero. In Eq. 3, the regularized term ensures that the system of equations does not converge to the  
 99 globally trivial solution (tension = 0 along all edges) [39]. Pressure in each cell was computed using

$$\underset{p}{\text{minimize}} \quad g(p) = \sum_{j=1}^E e_{j,\text{residual}}^2, \quad (4)$$

100 where  $E$  is the total number of edges in the colony and  $e_j$  is the residual error from the pressure balance  
 101 at the  $j^{\text{th}}$  edge. Tension and pressure solutions were normalized to an average of 1 and 0 respectively,  
 102 similar to prior work [34, 36, 35]. In contrast to previous methods, DLITE uses the values of tension  
 103 at each edge and pressure in each cell from the previous time point as an initial guess for the current

## Dynamic tension estimation

---

104 timepoint. This mode of time-stepping in the optimization procedure enables us to use information  
105 from previous time points to predict the values of tension and pressure at the current time point and  
106 forms the basis of DLITE’s improved performance across time-series.

### 107 **Tracking nodes and edges**

108 An essential distinguishing characteristic of DLITE is the ability to provide an initial guess for each  
109 edge tension and each cell pressure, allowing us to incorporate a time history of cell-cell forces.  
110 However, this requires node, edge, and cell tracking over time. To implement tracking we first as-  
111 sign labels to nodes, edges, and cells at the initial time point. Then, nodes are tracked by assigning the  
112 same label to the closest node at the next time point. Edges are tracked by comparing edge angles con-  
113 nected to nodes with the same label and cells are tracked by matching cell centroid locations across  
114 time. Our model optimization pipeline was implemented using Scipy’s unconstrained optimization  
115 algorithm ‘Limited-memory Broyden–Fletcher–Goldfarb–Shanno (L-BFGS)’ [40]. The global opti-  
116 mization technique ‘Basinhopping’ was used to seek a global minimum solution at the first time point  
117 [41].

### 118 **Geometries for model validation**

119 Validation of DLITE requires the generation of dynamic 2D geometries with curvilinear edges whose  
120 cortical tensions are known. Many standard mathematical models describe the modification of cell-  
121 shape via applied forces that are either explicitly or implicitly specified. Such models include cellular  
122 Potts models [42, 43], Vertex models [44, 45] and cell-level finite element models [46, 47, 48]. Im-  
123 plicit models define an energy function relating the variation of tension and other properties in a 2D  
124 monolayer to cell shape. The gradient of this energy function leads to the movement of each vertex.  
125 Here, we employ an implicit model using the energy minimization framework Surface Evolver [49],  
126 which is designed to model soap films. The energy function ( $W$ ) was defined as

$$W = \underbrace{\sum_{j=1}^E t_j L_j}_{\text{Tension energy}} + \underbrace{\sum_{k=1}^C p_k A_k}_{\text{Pressure energy}}, \quad (5)$$

127 where  $t_j$ ,  $L_j$  are the tension and length of the  $j^{\text{th}}$  edge and  $p_k$ ,  $A_k$  are the pressure and area of the  $k^{\text{th}}$   
128 cell respectively.  $E$  and  $C$  are the total number of edges and cells in the colony (see SOM for details).

## Dynamic tension estimation

---

129 Here, the tension energy represents a net energy contribution due to adhesion forces that stabilize  
130 a cell-cell interface and actomyosin cortical tensions that shorten cell-cell contacts. Pressure was  
131 enforced as a Lagrange multiplier for an area constraint. Cell boundaries were free to move along the  
132 surface. Such a model outputs a minimum energy configuration through gradient descent, providing  
133 ground truth tensions to which we compare inference model outputs. While the model utilized here  
134 describes a monolayer as a 2D surface embedded in 3D space, it is possible to extend this work to 3D,  
135 covering the complex 3D structure present in many systems [36].

### 136 Sources of error due to digitization

137 Transforming single or multi-channel z-stacks of cell colonies into a connected network suitable for  
138 tension inference requires: *(i.)* Image pre-processing to produce a binary or otherwise simplified rep-  
139 resentation, *(ii.)* Skeletonization, creating a network of 0-width lines connecting nodes at junction  
140 points and *(iii.)* Post-processing of the skeletonized representation. Inherent ambiguities in this pro-  
141 cess introduce several challenges to successful tension inference. Some of these challenges, such as  
142 incorrectly detecting an edge, occur in single frames (Fig. 1C, Time t-1) while others, such as edge  
143 tracking across biological network reorganization, are only present in time series data (Fig. 1C, Time  
144 t). These challenges tend to occur more frequently as digitization is increasingly automated, creating  
145 a trade-off between data reliability and throughput.

## 146 Results

147 DLITE is built to use the tension at a specific cell-cell junction at a given time point as an initial guess  
148 to calculate tensions at the next time point. This logical progression then allows us to infer forces over  
149 time and test the strength of the inference method by correlation to ground truth values for synthetic  
150 geometries. We demonstrate robustness and sensitivity of DLITE by validating it against ground-truth  
151 tensions for multiple synthetic geometries, multiple tension perturbations within a colony, connectiv-  
152 ity ambiguities at single or multiple time points, curve-fit errors, node location errors, and topological  
153 changes like the shrinkage of cell-cell contacts. At each point, we compare predictions to those pro-  
154 duced by the state of the art CellFIT technique. We then apply DLITE to movies of skeletonizations  
155 of endogeneously tagged tight junction ZO-1 (*zonulae occludentes-1*) in an hIPS cell line and demon-  
156 strate improved tension stability in the inference of cell-cell forces during colony dynamics.

## Dynamic tension estimation

---

### 157 **Validation of DLITE as a dynamic tension-inference tool**

158 We validated DLITE in three steps. First, we compared edge tension and cell pressure solutions  
159 obtained using our implementation of the CellFIT algorithm and DLITE to ground truth values in  
160 synthetic geometries made available via the current version of CellFIT called ZAZU (Fig. S1). We  
161 re-implemented the CellFIT algorithm in Python because the source code of ZAZU is not publicly  
162 available. Both our re-implementation of CellFIT (Fig. S1B) and DLITE (Fig. S1C) perform identi-  
163 cally with respect to the ground truth for single frames (Fig. S1A), with an average error of  $\sim 0.02$   
164 (Fig. S1D).

165 Second, to generate a time-series of synthetic geometries, we simulated colonies that deformed  
166 smoothly across time using Surface Evolver [49]. Initial geometries were created from random  
167 Voronoi tessellations followed by Lloyd relaxation [50]. In order to generate a time-series, we per-  
168 formed multiple Evolver simulations where the tension of a few randomly selected edges were either  
169 increased or decreased between time points (Fig. 2A). Average edge tension at each time point was  
170 normalized to 1. We then stripped all tension and pressure information from the resulting shapes and  
171 used these shapes as input to our method. Using DLITE and CellFIT separately, we inferred colony  
172 forces and compared the two approaches (Fig. 2B, D). Initially, both methods performed identically,  
173 but began to show divergence after 3 frames. Importantly, we observed that the values of tension pre-  
174 dicted using our method remain closer together over time and are better correlated ( $r = 0.94$  (DLITE)  
175 vs  $r = 0.75$  (CellFIT)) to the ground truth (Fig. 2 B, D). Further, we observed that the variation in ten-  
176 sion defined by the change in edge tension over time denoted as  $\Delta$ tension, using DLITE also correlates  
177 better to the ground truth change in edge tension (Fig. 2C). The improved performance of DLITE at  
178 later time points (Fig. S2B) results from DLITE use of information from prior time points to improve  
179 tension predictions in the presence of large curve-fit residuals (Fig. S2A), thereby reducing sensitivity  
180 to curve-fitting errors. In the absence of an informed prior, i.e. when we use random initial guesses  
181 sampled from a random Gaussian distribution at every time point, we observed poor performance of  
182 DLITE, with correlations ranging from 0.75 to 0.89.

183 Third, to ensure robustness of the performance of DLITE, we tested multiple tension perturbations  
184 via different combinations of increasing and decreasing edge tension in the same geometry (Fig. S4)  
185 and similar perturbations in other randomly generated geometries (Fig. S5). In all cases, we observed  
186 equivalent or better correlation of both the tension and change in edge tension with the ground truth



## Dynamic tension estimation

---

187 using DLITE as compared to CellFIT.

### 188 **DLITE is robust to digitization ambiguities**

189 The input to a force-inference model is a map of colony shape as a series of curved edges and the nodes  
190 where edges join (Fig. 1B). Segmentation transforms image data into information about the isolated  
191 geometric structures [51, 52]. Subsequently, skeletonization methods extract lines that characterize  
192 the topology and connectivity of the tension bearing network in the colony. Ambiguities or errors in  
193 this mapping present challenges to force inference techniques that rely on precise colony connectivity  
194 and edge tracing [34, 35, 36]. Some of these conditions are shown in Fig. 1C. New methods have  
195 improved the quality and repeatability of predicted network topology and connectivity; both deep  
196 learning models and traditional computer vision techniques have made significant advances in 2D/ 3D  
197 biological segmentations [53, 54, 55, 56]. Despite these advances, current skeletonization methods  
198 continue to require semi-manual post-processing because of the ambiguities present in the structures  
199 during imaging and errors resulting from the image capturing modalities. This semi-manual cleanup  
200 becomes increasingly impractical for larger colonies and time series. As a result, we require force-  
201 inference techniques robust to errors in mapping. As we demonstrate below, our inference method  
202 has increased robustness to multiple edge/node mapping errors. Therefore, our method decreases  
203 the number of manual corrections required, and increases the tractability for inferring forces. Here  
204 we evaluate the effects of edge/node mapping errors on force-inference in a single image and in a  
205 time-series.

206 We first analyzed, at a single time point, the effect of a missing intersection between two edges, a  
207 commonly occurring connectivity error. As before, we generated a synthetic colony image to initialize  
208 the system with known edge tensions. Fig. 3A shows a random Voronoi tessellation generated using  
209 Surface Evolver where 50 edges (out of 330 total) have larger values of tension than others. The ground  
210 truth tensions were the inputs given to Surface Evolver (Fig. 3A). A single edge was deliberately traced  
211 incorrectly to introduce a connectivity error (Fig. 3A, *inset*). This error resulted in the loss of a triple  
212 junction and loss of cellular integrity. Since the node of interest is now connected to two edges instead  
213 of three, we can no longer conduct a tension balance at that location. Such an ill-posed problem  
214 results in a singular tension matrix  $G_\gamma$  (Eq. 6), implying that CellFIT is unable to infer a correct  
215 tension distribution (Fig. 3A&B). However, the use of a regularizer in DLITE (Eq. 3) reduces the

## Dynamic tension estimation

---

216 effect of local tension errors on the global data set. As a result, we find that at a given time point,  
217 DLITE is able to provide a good estimate of the tension of the neighboring edges, even in the presence  
218 of connectivity errors (Fig. 3C, see also Figs. S6, S7).

219 A commonly occurring digitization challenge results from poor estimation of edge curvature due  
220 to incorrect values of between-edge angles at a particular node. Errors in curve-fitting can lead to poor  
221 tension residuals (Eq. 1) or large condition numbers of tension matrices (Eq. 6), which is defined as  
222 the ratio of the largest to smallest singular values in the SVD (Singular Value Decomposition) of the  
223 given tension matrix. Subsequently, this leads to poor inference of tension (Fig. 2). This is especially  
224 problematic when cell-cell junctions are distinctly non-circular, as they commonly are. To simulate  
225 this, we generated a time-series of synthetic geometries using Surface Evolver such that later time  
226 points are distinctly non-circular (Fig. S3A). The large curve-fit residuals at later time points (Fig.  
227 S3B) lead to ill-conditioned tension matrices and errors in tension inference (Fig. S3C). However,  
228 DLITE uses tension information from prior time points to retain the distribution of tensions and is not  
229 poorly scaled by these curve-fit errors (Fig. S3C).

230 Another major digitization challenge for force-inference models is the accurate determination of  
231 node locations. Localization errors in node coordinates also have the downstream impact of changing  
232 connected edge curvatures (Fig. 5B). We simulated this type of error by adding levels of Gaussian  
233 noise to nodes in a synthetic colony (Fig. 5A, red nodes). Noise levels 1 (Fig. 5C, F), 2 (Fig. 5D, G)  
234 and 3 (Fig. 5E, H) refer to the Gaussian noise terms with a mean of 0 and standard deviations of 0.1,  
235 0.5, and 1 respectively. Red node coordinates are (480.95, 525.7), (487.76, 536.94), (498.63, 522.1),  
236 (524.25, 503.43), (535.62, 515.97), arranged from left to right. In all cases, we observed equivalent  
237 (Noise level 1) or improved performance (Noise levels 2, 3) when using DLITE compared to CellFIT.  
238 Thus, DLITE offers improved quality of tension inference in the presence of ambiguities in node  
239 location.

240 Finally, we considered a class of mapping challenges that are unique to time-series data – identifi-  
241 cation of edges from one frame to the next. Misidentification of edges frequently occurs when an edge  
242 is lost for a single frame, severing the edge's connection to its prior label. Fig. 3D shows a time-series  
243 with a missing edge (edge label 33) and two missing cells at time point 8. The missing edge leads  
244 to the loss of a triple junction, and consequently a singular tension matrix (Fig. 3E, CellFIT). For  
245 tracking purposes, missing an edge also means that the edge that was being tracked up to that point  
246 no longer exists, and therefore a new edge label is assigned. Since edges with new labels do not have

## Dynamic tension estimation

---

247 an initial tension guess from an identical label at prior time points, these edges are given an initial  
248 guess for the value of tension equal to the average initial guess of all edges connected to that edge.  
249 By using such a scheme, DLITE can predict tension and  $\Delta$ tension (change in edge tension of an edge  
250 label between adjacent time points) that correlates well with the ground truth (Fig. 3E, F). Thus, in  
251 both images and movies of colonies, we find that use of information from the neighbouring region  
252 allows DLITE to handle digitization ambiguities and errors better and robustly predict the distribution  
253 of cell-cell forces.

### 254 **DLITE is robust to topological changes**

255 Network topology or the structure of edges and vertices often display changes in time-series data. In  
256 Fig. 3D, for example, there are two topological changes at time points 6 and 8 (edge labels 8 and 25  
257 respectively) that result in differences between CellFIT and DLITE (Fig. 3E, F), with DLITE showing  
258 better correlation to the ground truth. Handling of a time-ordered network requires the tracking of  
259 nodes, edges, and cells over time. This can be done in 2 ways – if, for example, a single edge ceases  
260 to exist at a certain time point, we can choose to either keep that edge label and assume that it has  
261 temporarily left the field of view or assign new edge labels ensuring that the lost edge label ceases  
262 to exist [57]. Here, we choose the second option in order to condition the network based only on the  
263 immediately prior time point. Thus, an edge label that could not be tracked after a time point no longer  
264 exists and is assigned a new label. These rules were applied to nodes and cells as well.

265 If the observed topologies of a cellular network are constantly changing, how then does it affect  
266 inferred cell-cell forces? To study the effect of topological changes, we take advantage of the fact  
267 that decreasing the tension of two edges in a triple junction results in a decrease of the length of the  
268 third connected edge in Surface Evolver. Fig. 4A shows an example time series where edge label 15  
269 disappears at time point 18. This single topological change leads to an ill-conditioned tension matrix  
270 (Eq. 6, Fig. 4B, C). However, DLITE retains the correct distribution of tensions at time point 18 (see  
271 also Fig. 3E, edge label 25 at time point 8 and Fig. S8A) using the initial guess from prior time points.  
272 While this specific network structure led to an ill-conditioned tension matrix after a single edge loss,  
273 this is not always the case. If the tension matrix is well-conditioned after the topological change (Fig.  
274 3E, edge label 8 at time point 6 and Fig. S8B), then CellFIT retains a good solution quality. However,  
275  $\Delta$ tension is less smooth, and both the tension and  $\Delta$ tension still correlate better to the ground truth

## Dynamic tension estimation

---

276 while using DLITE (Fig. 3E,F and Fig. S8B). Thus, force inference in dynamic network topologies  
277 benefits from incorporating a temporal history of cell-cell forces.

### 278 **Application to ZO-1 tight junctions**

279 Finally, we applied DLITE to experimental images of colonies of hIPS cells. ZO-1 in hIPS cells was  
280 tagged at its endogenous locus with mEGFP and visualized using a spinning confocal disk microscope  
281 (see SOM for more details). We chose this system because tight junctions (or *zonulae occludentes*)  
282 are known to form a selective barrier, regulating paracellular diffusion through the spaces between  
283 cells. Injury of tight junctions can impair barrier function, leading to complications in lungs [58, 59],  
284 kidneys [60], eyes [61] or the small intestine [62]. The actin cytoskeleton plays an important role in  
285 the regulation of this barrier function [63], and is connected to the rest of the tight junction complex  
286 through ZO-1 proteins [64, 65]. Recent studies suggest that actin polymerization and transient Rho  
287 activation ('Rho flares') act to quickly restore barrier function upon localized ZO-1 loss at cell-cell  
288 contacts [66]. Mechanical cues from the polymerization and branching of the actin network can lead  
289 to reshaping of tight junctions, resulting in varying barrier phenotypes.

290 Using a skeletonization of segmented GFP images, we predicted the evolution of intercellular  
291 forces in three different ZO-1 time series using both DLITE and CellFIT (Fig. 6A, B and C). Since no  
292 ground truth is available in this case, we determined the quality of predicted tensions using condition  
293 numbers ( $\kappa$ ) of the tension matrix (Eq. 6) and tension residuals. We note that the relative distribution of  
294 tensions range from 0 to 3, such that the average tension is normalized to 1. The time interval between  
295 adjacent time points was 3 minutes. The example frames shown in Fig. 6A, B, C are organized as raw  
296 GFP (upper), CellFIT predicted tensions (middle) and DLITE predicted tensions (lower). In every  
297 frame, we observed at least one kind of digitization error, leading to poor tension matrix condition  
298 numbers or tension residuals. Single frame errors such as curvature errors (Fig. 6A - Time 0,  $\kappa = 69$   
299 and Fig. 6B - Time 0,  $\kappa = 23$ ), connectivity errors (Fig. 6A - Time 10,  $\kappa = 136$  and Fig. 6C - Time 6,  
300  $\kappa = 10^{18}$ ), node location errors (Fig. 6B - Time 5,  $\kappa = 10^{16}$  and Fig. 6C - Time 0,  $\kappa = 10^{16}$ ) and time-  
301 series specific errors such as new edges (Fig. 6A - Time 5,  $\kappa = 32.5$ ), missing edges (Fig. 6C - Time  
302 3,  $\kappa = 31$ ) and topological changes (Fig. 6B - Time 25,  $\kappa = 46$ ) result in loss of tension stability and  
303 errors (Fig. 6A, CellFIT). Despite these digitization errors, DLITE shows increased tension stability  
304 (Fig. 6A, DLITE), demonstrating its utility. Heatmaps of dynamic edge tension and change in edge

## Dynamic tension estimation

---

305 tension ( $\Delta$ tension) for the time-series in Fig. 6 are also shown in Fig. S9. The improved performance  
306 of DLITE is predicated on reduced tension residuals at every time point (Fig. S10). Importantly, the  
307 reduction in tension residuals is accompanied by a reduced dynamic change in edge tension ( $\Delta$ tension,  
308 Fig. S9), indicating a smoothness across time.

309 Interestingly, we observed an increase in tension adjacent to a dividing cell immediately after a  
310 mitotic event (Fig. 7A, red box) in a time-series of ZO-1 GFP with a single mitotic event at time  
311 point 14. This increase in tension post-mitosis was observed using both methods (Fig. 7C, edge labels  
312 3, 10 and 11), but only after the removal of digitization errors during a semi-manual skeletonization  
313 process. This step was important to ensure non-poorly scaled CellFIT solutions, such as the ones at  
314 time points 2 and 13. As before, both the tension residuals (Fig. 7B) and the dynamic change in  
315 tension ( $\Delta$ tension, Fig. 7D, E) were reduced when using DLITE. The reduction in  $\Delta$ tension was  
316 determined to be sensitive to the time interval. The standard deviation of  $\Delta$ tension across time was  
317 significantly reduced at a time lag of 1 frame (3 minutes), but showed no difference between methods  
318 for a time lag of 5 frames (15 minutes).

## 319 Discussion

320 In this study, we have presented a new method, DLITE, which is based on a local optimization of  
321 tension residuals to compute dynamic cell-cell forces. We validated the predictive power of DLITE  
322 using synthetic geometries generated by Surface Evolver [49] and showed that DLITE performs better  
323 than the prior state-of-the-art method CellFIT [34] when applied to time-series data. Importantly, this  
324 method incorporates a framework to track nodes, edges, and cells across time.

325 We demonstrated that DLITE is robust to digitization challenges common in time series data such  
326 as poor estimates of edge angle, errors in node location, connectivity errors and topological changes  
327 that occur as cells move and encounter different neighbors. Finally, we applied DLITE to estimate  
328 edge tensions in multiple time-series of ZO-1 tight junctions and showed improved stability in tension  
329 predictions and an increase in tension post mitosis. We indicated that DLITE displays a reduced  
330  $\Delta$ tension compared to CellFIT, indicating greater temporal smoothness. We observed this reduction  
331 in three other scenes of the ZO-1 tight junction.

332 The need for dynamic force-inference tools to understand cell shape and colony rearrangement is  
333 driven by their applicability to morphogenic processes from wound healing to germ-band extension to

## Dynamic tension estimation

---

334 colony reorganization [1, 2, 3, 4]. These processes rely on transient mechanical forces that are ideally  
335 detected by the extended non-perturbing observations for which DLITE is designed. Computing the  
336 dynamics of cell-cell forces via this computational framework complements experimental advances  
337 and enable data-driven estimation of intercellular forces, particularly as biological data sets grow in  
338 size.

339 While useful, DLITE makes assumptions about the system that create limitations. Specifically,  
340 DLITE assumes 1) edges are circular arcs, 2) that tension is correlated from timepoint-to-timepoint,  
341 and 3) that sufficient computational resources are available. 1) The tensions calculated using DLITE  
342 depend on fitting circular arcs to every edge. This approximation breaks down if the edge is not under  
343 sufficient tension or the cytoskeleton is strongly perturbing it inhomogeneously across the interface.  
344 Under these conditions the inferred tensions will not approach the ground truth. 2) Using local opti-  
345 mization seeded with tensions from the prior time point assumes that the tensions are correlated across  
346 these time points. This is evidently true as the inter-frame interval approaches zero and evidently false  
347 as the same interval approaches infinity. DLITE's informed prior decreases in usefulness as we in-  
348 crease this interval or the timescale of our system's force variance decreases. 3) Finally, as the amount  
349 of biological data increases, implementation of DLITE must be optimized for computation speed in  
350 large colonies.

351 DLITE offers comparable tension inference to existing methods when applied to single time  
352 points, increased performance when applied across time points, increased stability in the face of seg-  
353 mentation challenges, and increased stability when applied to limited experimental data sets. Future  
354 use of DLITE will look at dynamic changes in cell-cell forces in larger data sets of ZO-1 tight junc-  
355 tions, allowing the visualization of cell-cell forces during large scale colony reorganization.

## 356 **Competing Interests**

357 The authors declare that they have no competing financial interests.

## 358 **Acknowledgments**

359 We thank the entire Allen Institute for Cell Science team, who generated and characterized the gene-  
360 edited hiPS cell lines and developed image-based assays used in this work. We especially thank the

## Dynamic tension estimation

---

361 Allen Institute for Cell Science Assay Development team, particularly Irina Mueller for collecting the  
362 ZO-1 time series used here and Susanne Rafelski for invaluable discussions and advise. We would  
363 like to thank the Allen Institute for Cell Science Animated Cell team and Daniel Toloudis specifically  
364 for providing the 3D rendering of ZO-1 cells used in Figure 1. We thank Paul G. Allen, founder of  
365 the Allen Institute for Cell Science, for his vision, encouragement and support. We would also like to  
366 thank members of the Rangamani lab and Dr. Matthew Akamatsu for comments and feedback. This  
367 work was partially supported by ARO W911NF1610411 to P.R.

## Dynamic tension estimation

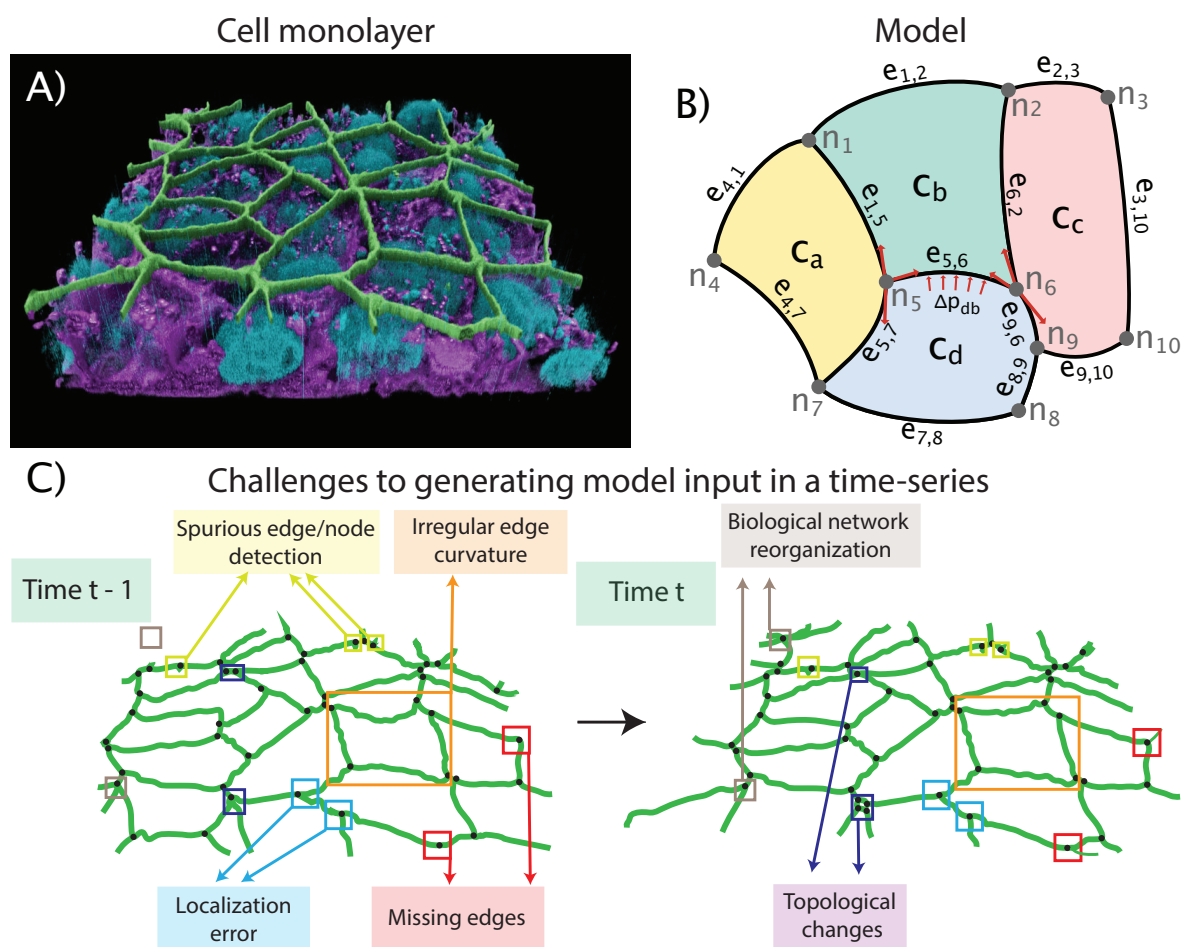

Figure 1: 3D cell view of tight junction location, how this is represented in the model, and the challenges in doing so. (A) 3D view of tight junctions in human induced pluripotent stem (hiPS) cells from the Allen Cell Explorer (Green - Tight junctions, Purple - Membrane, Blue - Nucleus). We infer cell-shape and edge shape from tight junctions as they localize to the tension bearing apical surface of epithelial-like tissues. (B) Schematic of cell-interface representation used in DLITE and CellFIT force-inference techniques [34]. A colony is represented as a set of nodes ( $n$ ), edges ( $e$ ) and cells ( $c$ ). Edges are directional. Tension balance occurs at each node (red arrows at  $n_5$  and  $n_6$ ). Pressure difference ( $\Delta p_{d,b}$ ) across a junction is estimated using Laplace's law (red arrows at  $e_{5,6}$ ). (C) Ambiguities in image segmentation introduce challenges to successful tension inference. Time  $t - 1$  shows single time point challenges like spurious edge/node detection, irregular edge curvature, node location errors and incomplete segmentation. Time  $t$  shows time lapse challenges like biological network reorganization and topological changes.



## Dynamic tension estimation

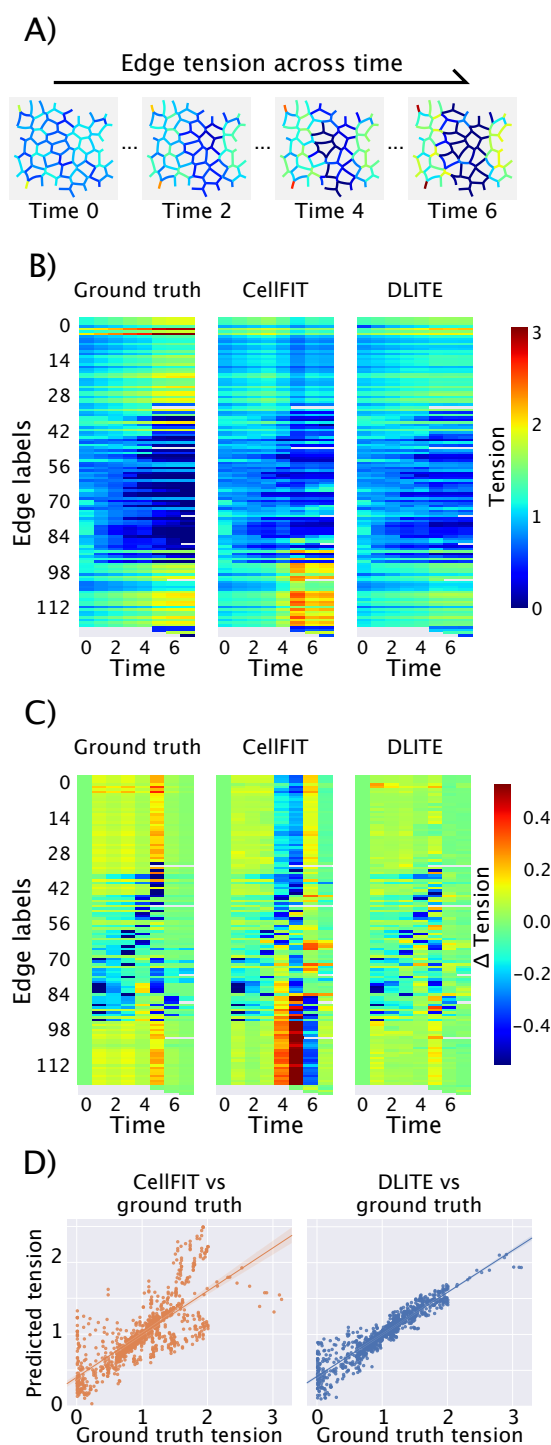

Figure 2: Comparison of DLITE and CellFIT force-inference techniques for digitized time series. Synthetic colonies were generated from random Voronoi tessellations and morphed to minimum energy configurations (Eq. 5) using Surface Evolver [49]. A random set of edges within the colony were perturbed by decreasing or increasing their tensions, resulting in a new colony structure; repeating this process produced a time-series of colony rearrangement. (A) Time-series of a synthetic colony showing the decrease in tension of 70 edges in the middle of the colony and the increase in tension of 40 edges along the boundary. (B) Heatmap of dynamic edge tensions for ground truth, CellFIT, and DLITE. (C) Heatmap of dynamic change (derivative of tension) in edge tensions for ground truth, CellFIT, and DLITE. (D) A comparison of inferred vs ground truth tensions for CellFIT ( $r = 0.75$ ) and DLITE ( $r = 0.94$ ). Here,  $r$  is the Pearson's correlation coefficient.

## Dynamic tension estimation

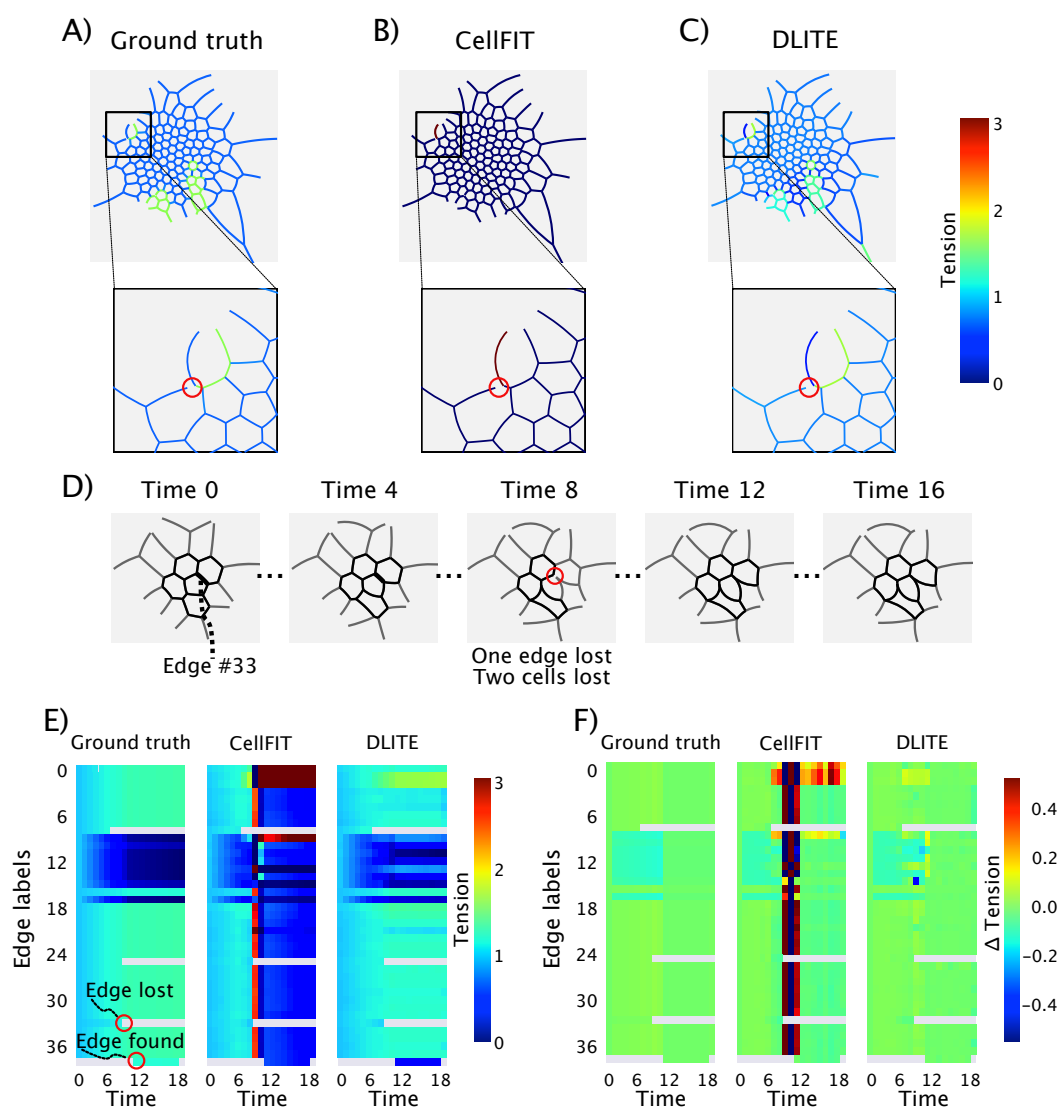

Figure 3: Reduced sensitivity to connectivity errors in DLITE. (A) Ground truth tensions for a synthetic geometry containing 330 edges generated using Surface Evolver with a single edge connectivity error (circled in red). (B) Edge tensions computed using CellFIT for the geometry in (A). (C) Edge tensions computed using DLITE for the geometry in (A). (D) Time-series of a synthetic geometry containing 37 edges generated using Surface Evolver with a single edge connectivity error at time 8 (circled in red). This edge is found again in time step 10 (representing a transient encoding error) but treated as a new edge. (E) Heatmap of dynamic edge tensions for ground truth, CellFIT ( $r = 0.14$ ) and DLITE ( $r = 0.87$ ) for the time-series in (D). (F) Heatmap of dynamic change (derivative of tension) in edge tensions for ground truth, CellFIT, and DLITE for the time-series in (D).

## Dynamic tension estimation

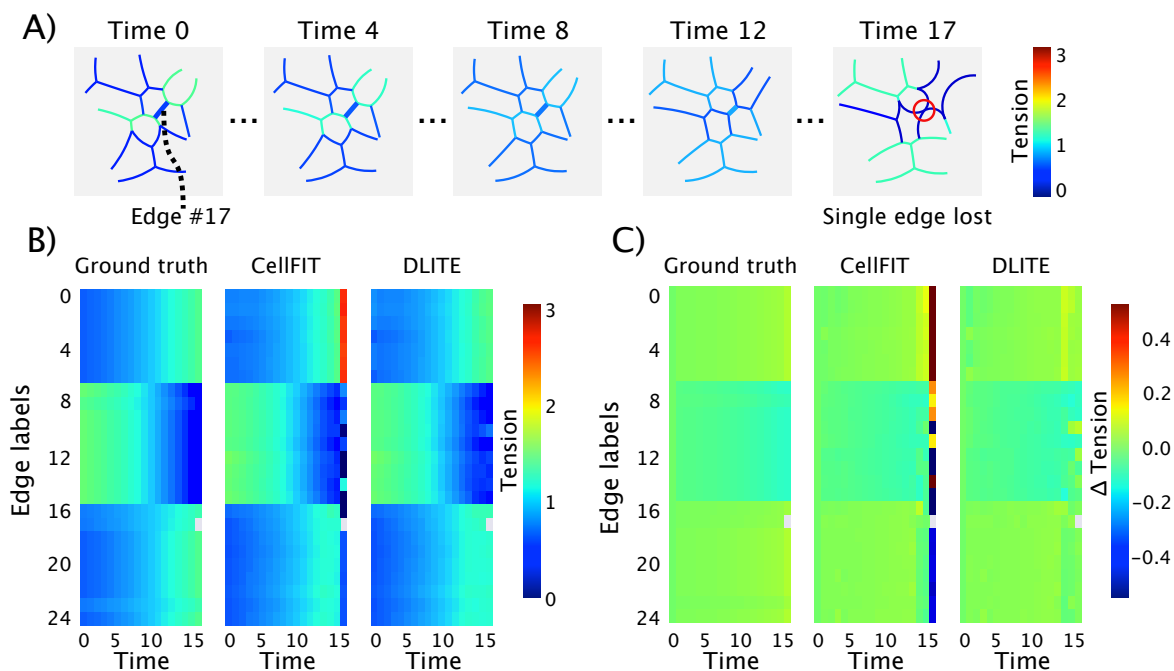

Figure 4: Reduced sensitivity to topological changes in DLITE. (A) Time-series of a synthetic geometry containing 24 edges generated using Surface Evolver where edge label 17 disappears at time 17 (circled in red). (B) Heatmap of dynamic edge tensions for ground truth, CellFIT ( $r = 0.75$ ), and DLITE ( $r = 0.98$ ). DLITE shows reduced disruption to tension prediction on topological change and more closely matches the ground truth tension. (C) Heatmap of dynamic change (derivative of tension) in edge tensions for ground truth, CellFIT and DLITE.

## Dynamic tension estimation

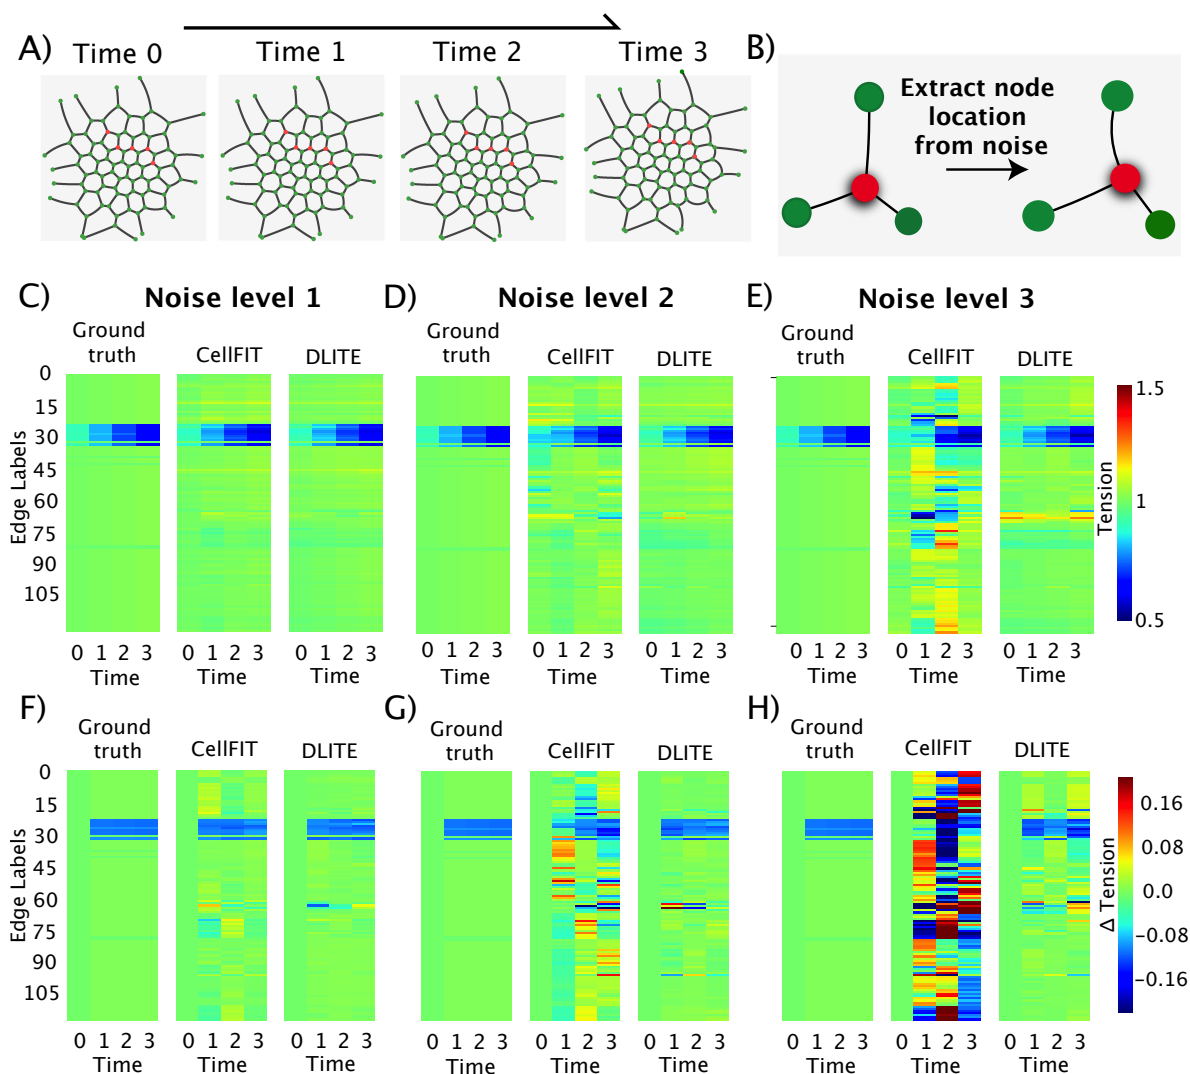

Figure 5: Reduced sensitivity to node location errors in DLITE. Noise levels 1, 2 and 3 correspond to random Gaussian noise added to red node locations, all with a mean 0 and standard deviation 0.1, 0.5 and 1 respectively. (A) Time-series of synthetic colony generated using Surface Evolver. The five nodes subject to perturbation with noise are shown in red. (B) Change in shape of a single triple junction around the red node in the presence of noise. (C, D, E) Heatmap of dynamic edge tensions for ground truth, CellFIT and DLITE at Noise levels 1, 2 and 3 respectively. (F, G, H) Heatmap of dynamic change (derivative of tension) in edge tensions for ground truth, CellFIT and DLITE at Noise levels 1, 2 and 3 respectively.

## Dynamic tension estimation

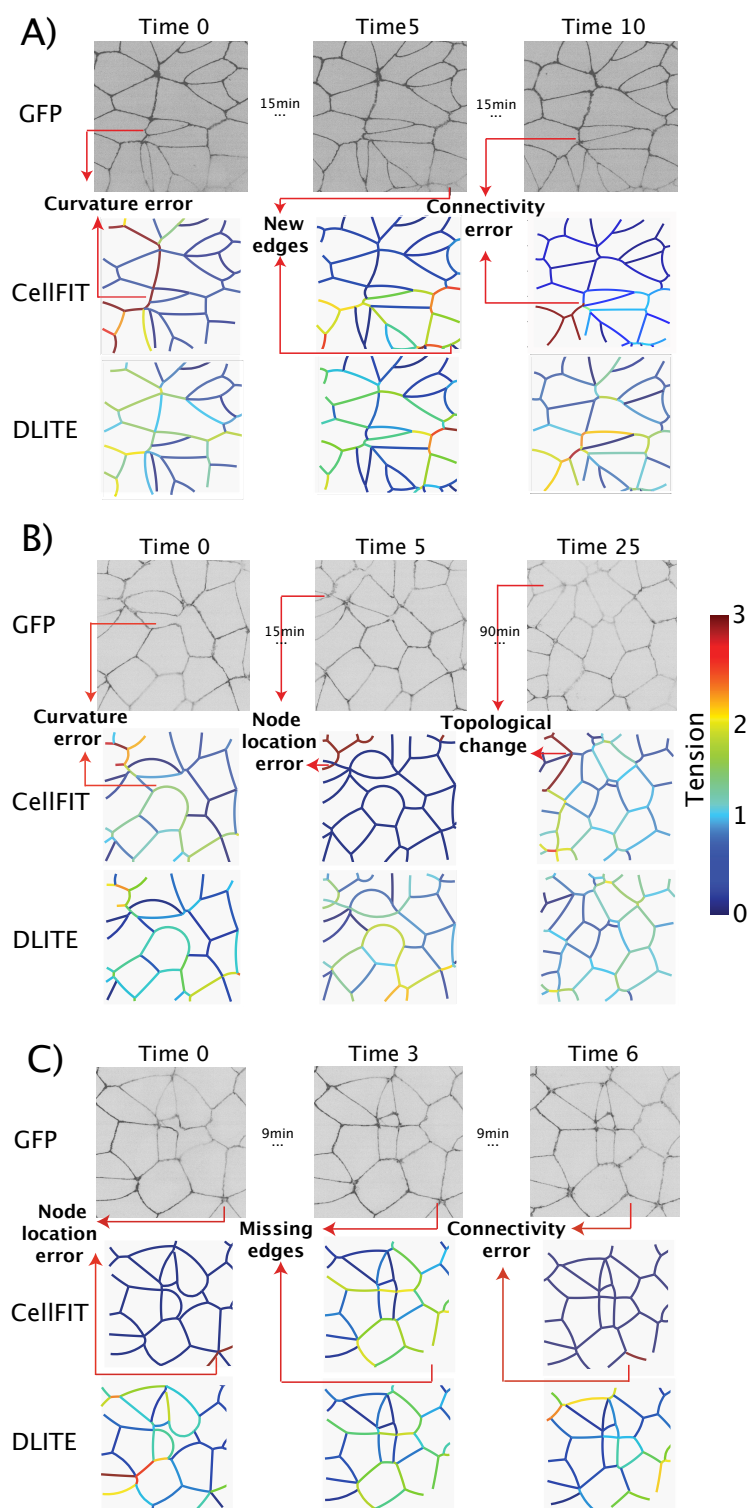

Figure 6: DLITE shows increased tension stability during tension inference in multiple time-series of ZO-1 labeled hPS cells. Example frames from three time series are shown in A, B and C and arranged as ZO-1 GFP (upper) and colony edge tensions predicted by CellFIT (middle) and DLITE (lower). Here we use  $\kappa$  to denote the condition number of the tension matrix  $G_\gamma$  (Eq. 6). (A) DLITE shows increased stability to curvature errors (Time 0,  $\kappa = 69$ ), new edges (Time 5,  $\kappa = 32.5$ ), connectivity errors (Time 10,  $\kappa = 136$ ). (B) DLITE shows increased stability to curvature errors (Time 0,  $\kappa = 23$ ), node location errors (Time 5,  $\kappa = 10^{16}$ ) and topological changes (Time 25,  $\kappa = 46$ ). (C) DLITE shows increased stability to node location errors (Time 0,  $\kappa = 10^{16}$ ), missing edges (Time 3,  $\kappa = 31$ ) and connectivity errors (Time 6,  $\kappa = 10^{18}$ .)

## Dynamic tension estimation

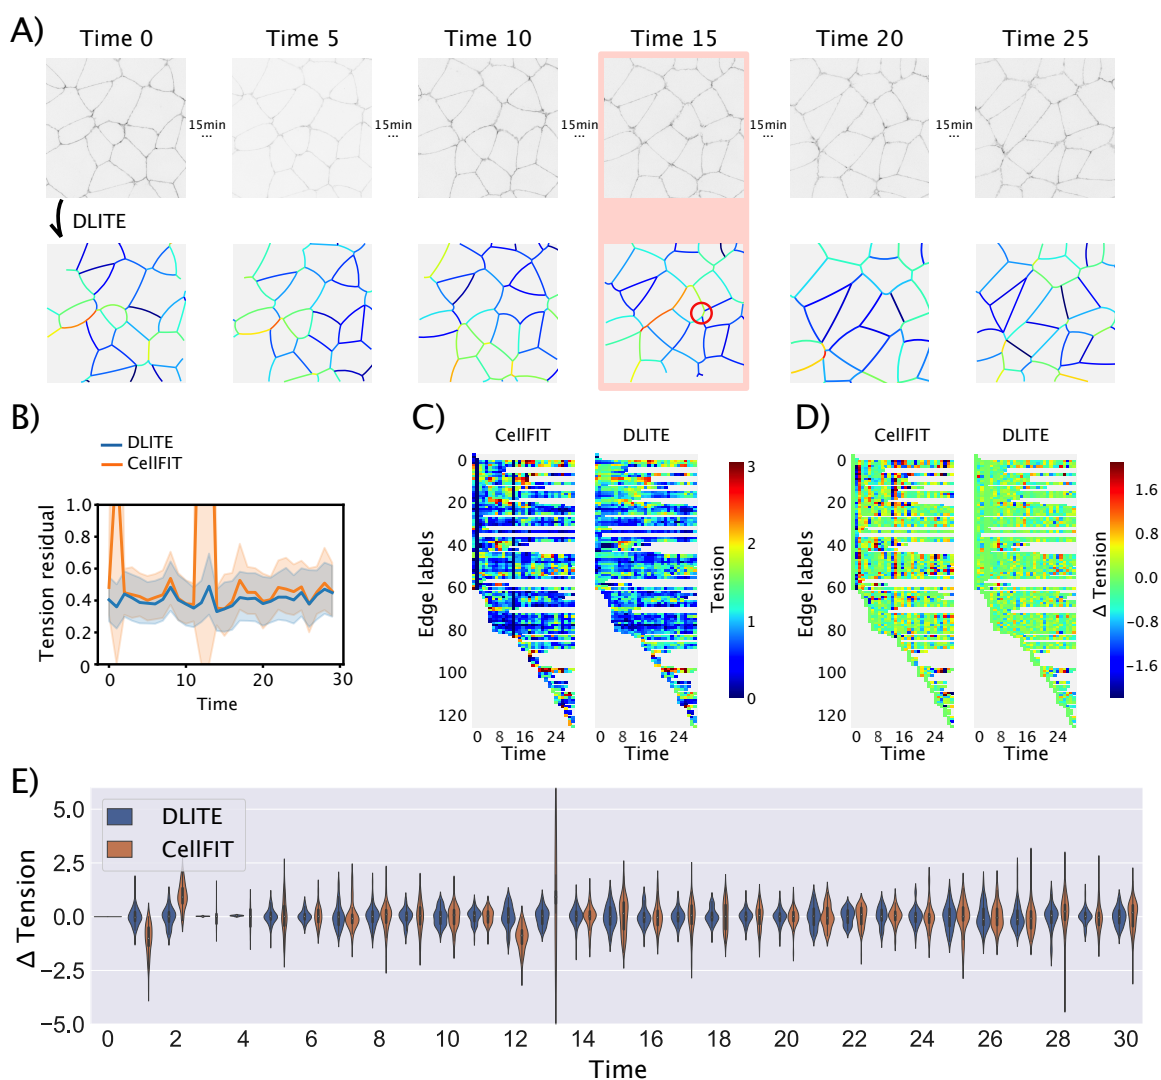

Figure 7: Dynamic cell-cell forces from a time-series of ZO-1 tight junction locations in hIPS cells. DLITE shows reduced fluctuation in tension change, showing more temporally correlated tension predictions. (A) Time-series of ZO-1 GFP images (upper) and dynamics of colony edge tension predicted by DLITE (lower). The following time points are shown: 0, 5, 10, 15, 20 and 25. Time 15 shows an increase in tension along a ridge in the middle of the colony following a mitotic event and the forming of a new edge (circled in red). The time interval between adjacent time points was 3 minutes. (B) Tension residuals at every time point showing an estimate of central tendency and corresponding confidence interval. (C) Heatmap of dynamic edge tensions predicted by CellFIT and DLITE. (D) Heatmap of dynamic change (derivative of tension) in edge tensions predicted by CellFIT and DLITE. (E) Distribution of  $\Delta$ tension (derivative of tension) at every time point for CellFIT and DLITE.

## 368 **Supplementary Online Material**

### 369 **Data structures**

370 We implemented our code using the standard scientific Python stack. An object/class groups similar  
371 constructs together. Here, we defined 4 main objects - nodes, edges, cells and colonies. Nodes are  
372 objects with a unique location  $(x, y)$  and node label. Edges are objects that are connected to two  
373 unique nodes with a defined edge curvature, direction and edge label. Cells are objects with a unique  
374 cell label that contain a particular list of nodes and edges, where a combination of the contained edges  
375 forms a cycle. Colonies are objects comprising a list of cells and stray edges (edges that are not part  
376 of any cell). Each class has several other defined properties that were useful for time-series tracking  
377 and cell-cell force inference.

### 378 **Curve-fitting**

379 We fit a circular arc to a given list of  $(x, y)$  edge co-ordinates using a least squares fitting routine from  
380 the Python module Scipy [40].

### 381 **Cell finding algorithm**

382 Given a list of nodes and edges, we loop through every edge to find the two (or fewer) cells of which  
383 each edge might be a part. We start from an initial edge and find the closest edge that forms the  
384 smallest (or largest) angle with the current edge. We repeated this process by setting the new edge as  
385 current edge, until the second node of the current edge is identical to the first node of the initial edge  
386 , thus indicating a complete cycle. We validated this algorithm in planar graphs generated using the  
387 NetworkX module [67]. In pseudocode, this can be formulated as shown in Algorithm 1.

### 388 **Surface Evolver simulations**

389 Synthetic geometries were generated using the Surface Evolver [49], which provides a precise way  
390 to make model geometries using soap film physics. An initial surface was first defined in a datafile  
391 comprising a list of vertices, edges, facets and bodies, along with any volume or area constraints.

## Dynamic tension estimation

---

---

### Algorithm 1 Cell finding algorithm

---

```
1: procedure
2:   for edge in edges do
3:     Conn edges  $\leftarrow$  Network connectivity of edge
4:     next edge  $\leftarrow$  max, min angle of Conn edges
5:     if cell found then return False
6:     while cell not found do
7:       Current edge  $\leftarrow$  Next edge
8:       Conn edges  $\leftarrow$  Network connectivity of Current edge
9:       next edge  $\leftarrow$  max, min angle of Conn edges
10:      if cell found then return Cell
```

---

392 Since we defined a 2D string model with a space dimension of 2, we enforced area constraints on  
393 the facets instead of volume constraints on the bodies. To generate the datafile, we made random  
394 Voronoi tessellations. This was followed by Lloyd relaxation to make a more uniform tessellation.  
395 Edges were then assigned random tensions. All cells were assigned the same fixed area in a single  
396 simulation (typically 5000). Evolver then uses gradient descent to morph the surface to a minimum  
397 energy ( $W$ ) configuration. This energy ( $W$ ) was defined as Eq. 5 with the pressure energy enforced  
398 as an area constraint. Multiple mesh refinement steps (adjustments of every vertex in the system)  
399 were used to ensure a minimum of 10 mesh points along every edge (for better curve-fitting). The  
400 evolved geometries were screened for edges that form cell-cell interfaces (as opposed to edges along  
401 the boundary that do not form an interface). These edges, along with their corresponding nodes and  
402 cells, were stored using our data structures.

403 In order to generate a time-series, we took a given geometry and perturbed the tension of random  
404 edges. Surface Evolver was used to solve for the minima. This was the next frame  $t + 1$ . We re-  
405 peated this tension perturbation procedure uniformly, such that the geometry was smoothly changing  
406 its curvature along every edge in correlation with a changing tension (Eq. 5). By stitching together  
407 multiple Evolver geometries that progressively showed increasing or decreasing curvature/tension of  
408 certain edges, we were able to generate movies of colony rearrangement that was smooth across time,  
409 for whom the ground truth tensions were the input to Surface Evolver.



## Dynamic tension estimation

---

### 410 **CellFIT solution**

411 CellFIT [34] evaluates the tension balance as a matrix system defined as

$$G_\gamma \gamma = 0, \quad (6)$$

412 where  $\gamma$  is a list of surface tension magnitudes and  $G_\gamma$  is a matrix of edge tension coefficients (sin's  
413 and cos's). Since the system of equations is over-determined, this is formulated as a constrained least  
414 squares (Karush Kuhn Tucker or KKT) matrix, which can be written as

$$\begin{bmatrix} G_\gamma^T G_\gamma & C_1^T \\ C_1 & 0 \end{bmatrix} \begin{bmatrix} \gamma_1 \\ \vdots \\ \gamma_N \\ \lambda_1 \end{bmatrix} = \begin{bmatrix} 0 \\ \vdots \\ 0 \\ N \end{bmatrix}, \quad (7)$$

415 where  $C_1 = [1, \dots, 1]$ ,  $\lambda_1$  is a Lagrange multiplier, and  $N$  is the number of edge tensions. This  
416 normalizes the average edge tension to 1. Similarly, the pressure balance is evaluated as a matrix  
417 system

$$G_p p = q, \quad (8)$$

418 where  $p$  is a matrix of cell pressures and  $q$  is a matrix of edge tensions divided by edge curvatures  
419 ( $t/r$ ), as per Laplace's law. This is also formulated as a constrained least squares matrix as

$$\begin{bmatrix} G_p^T G_p & C_2^T \\ C_2 & 0 \end{bmatrix} \begin{bmatrix} p_1 \\ \vdots \\ p_M \\ \lambda_2 \end{bmatrix} = \begin{bmatrix} q_1 \\ \vdots \\ q_M \\ 0 \end{bmatrix}, \quad (9)$$

420 where  $C_2 = [1, \dots, 1]$ ,  $\lambda_2$  is a Lagrange multiplier and  $M$  is the number of cell pressures. This  
421 normalizes the average edge pressure to 0.

### 422 **Force-inference algorithm**

423 In pseudocode, the force-inference algorithm can be formulated as shown in Algorithm 2.

## Dynamic tension estimation

---

---

### Algorithm 2 Dynamic cell-cell force inference algorithm

---

```
1: procedure
2:   for frame in movie do
3:     edges, nodes  $\leftarrow$  trace of image
4:     cells  $\leftarrow$  edges, nodes
5:     colony  $\leftarrow$  cells
6:     if labels is empty then return new labels  $\leftarrow$  nodes, edges, cells
7:     else tracked labels  $\leftarrow$  nodes, edges, cells
8:     if Make objective then
9:       Add tension residuals or pressure residuals to objective function,
10:      Update initial guess through labels,
11:     for node in nodes do
12:       if conn edges < 3 then return False
13:       else goto Make Objective
14:     if first image then return Basinhopping solution
15:     else L-BFGSB optimization solution
16:     for edge in edges do
17:       if conn cells < 2 then return False
18:       else goto Make objective
19:     if first image then return Basinhopping solution
20:     else L-BFGSB optimization solution
```

---

## Dynamic tension estimation

---

### 424 **Cell plating for imaging**

425 Human induced pluripotent stem cells (hiPSCs) were plated on glass-bottom multiwell plates (1.5H  
426 glass; Cellvis) coated with phenol red-free GFR Matrigel (Corning) diluted 1:30 in phenol red-free  
427 DMEM/F12 (Life Technologies). Cells were seeded at a density of  $2.5 \times 10^3$  in 96-well plates and  
428 (12.5–18) imaged 3–4 days later. A detailed protocol can be found at the Allen Cell Explorer (Allen  
429 Institute for Cell Science, 2017).

### 430 **Live-cell imaging**

431 Cells were imaged on a Zeiss spinning-disk microscope with a Zeiss 100 $\times$ /1.25 W C-Apochromat  
432 Korr UV Vis IR objective, a CSU-X1 Yokogawa spinning-disk head, and Hamamatsu Orca Flash 4.0  
433 camera. Microscopes were outfitted with a humidified environmental chamber to maintain cells at  
434 37°C with 5% CO<sub>2</sub> during imaging. Time-lapse movies were acquired every 3 minutes for 1.5 hours.

## Dynamic tension estimation

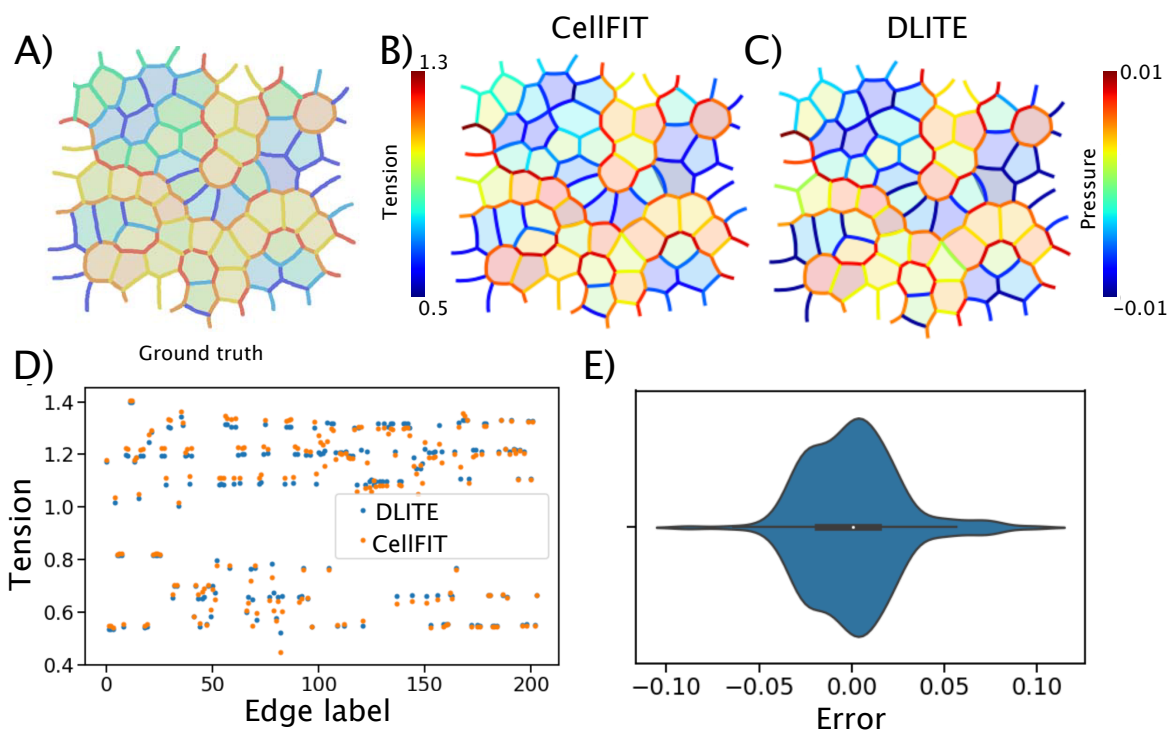

Figure S1: Validation of rewritten CellFIT code. (A) Ground truth geometry used in [34]. (B) Tensions and pressures predicted using CellFIT. (C) Tensions and pressures predicted using DLITE. (D) Tension vs Edge label for CellFIT and DLITE. (E) Error between DLITE tension and CellFIT tension.

435

436

437

438

439

440

## Dynamic tension estimation

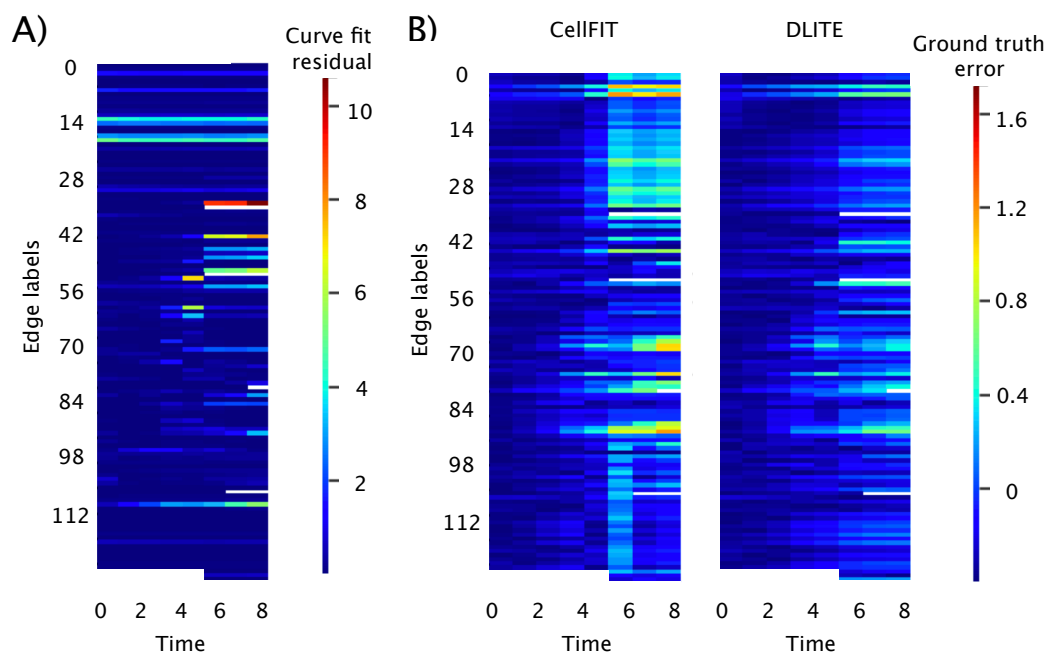

Figure S2: Curve fit residuals and ground truth error for the synthetic colony time-series shown in Fig. 2. (A) Heatmap of curve fit residuals. (B) Heatmap of dynamic ground truth tension errors using CellFIT and DLITE.

## Dynamic tension estimation

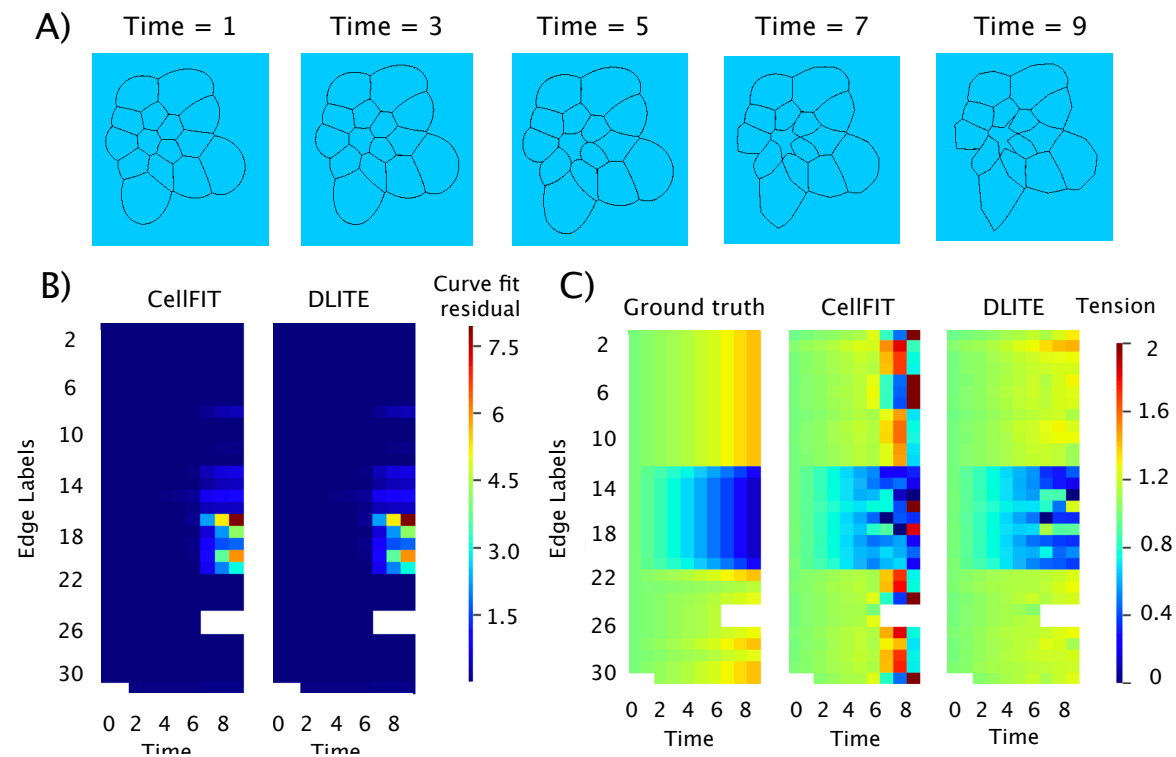

Figure S3: DLITE shows reduced sensitivity to curve fitting errors. (A) Time-series of a synthetic geometry evolved in Surface Evolver with distinctly non circular edges at later time points (Time 7, 9). (B) Heatmap of curve fit residuals. (C) Heatmap of dynamic edge tensions for ground truth, CellFIT and DLITE.

## Dynamic tension estimation

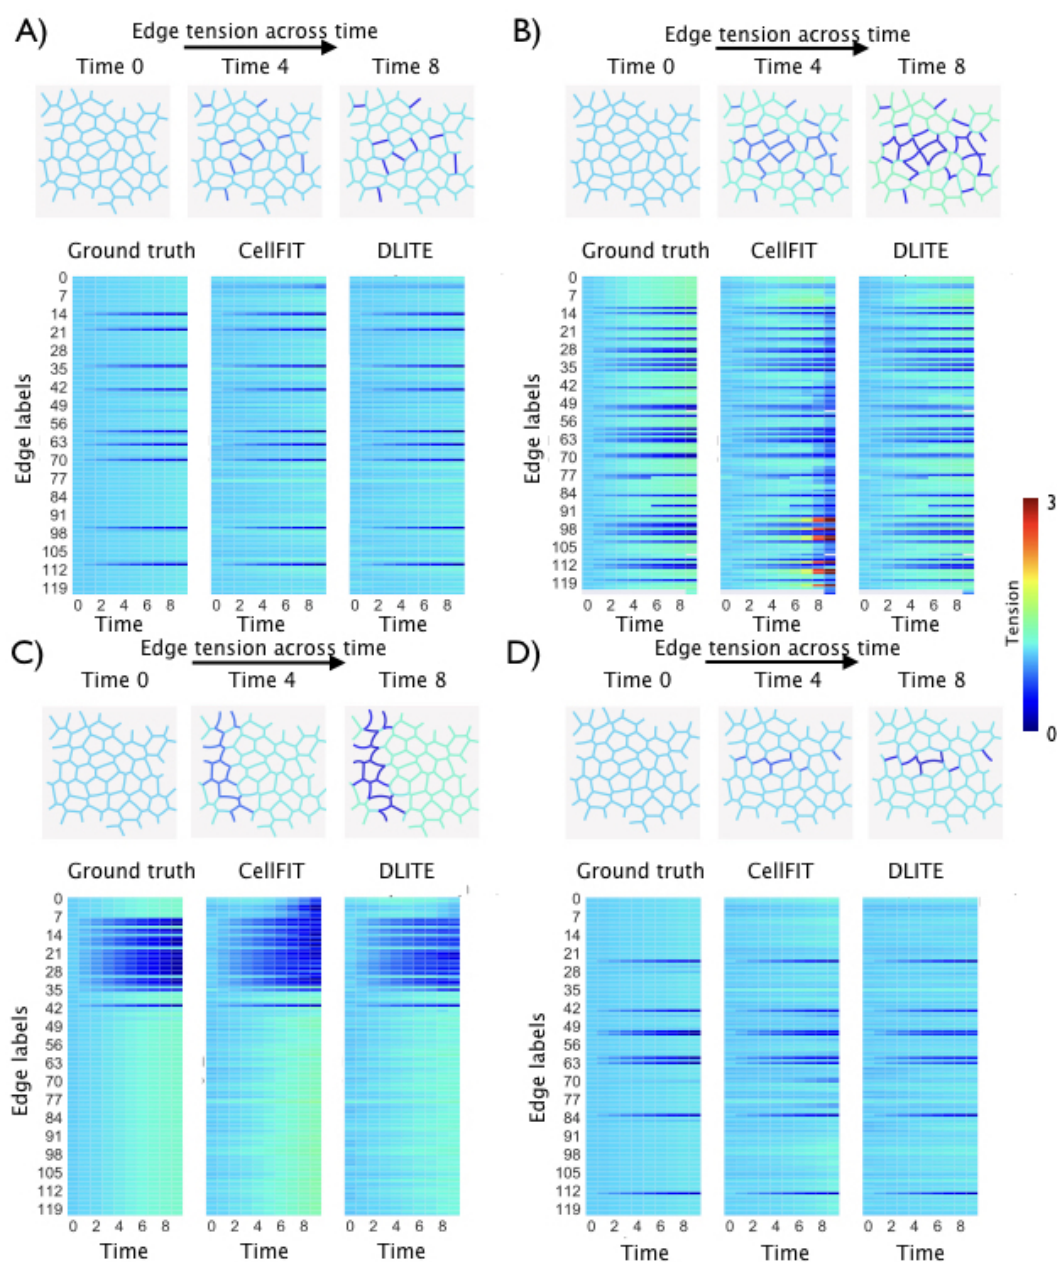

Figure S4: Four example time-series (A-D) of colony rearrangement simulated using four different combinations of decreasing the tension of a few edges and increasing tension of all other edges in the same colony geometry as that in Fig. 2. Average edge tension is normalized to 1 at every time point. Shown - 3 example time points (Time 0, 4 and 8) and heatmaps of dynamic edge tensions for ground truth, CellFIT and DLITE. (A) DLITE -  $r = 0.97$ , CellFIT -  $r = 0.96$ , (B) DLITE -  $r = 0.93$ , CellFIT -  $r = 0.54$ , (C) DLITE -  $r = 0.96$ , CellFIT -  $r = 0.86$ , (D) DLITE -  $r = 0.94$ , CellFIT -  $r = 0.93$

## Dynamic tension estimation

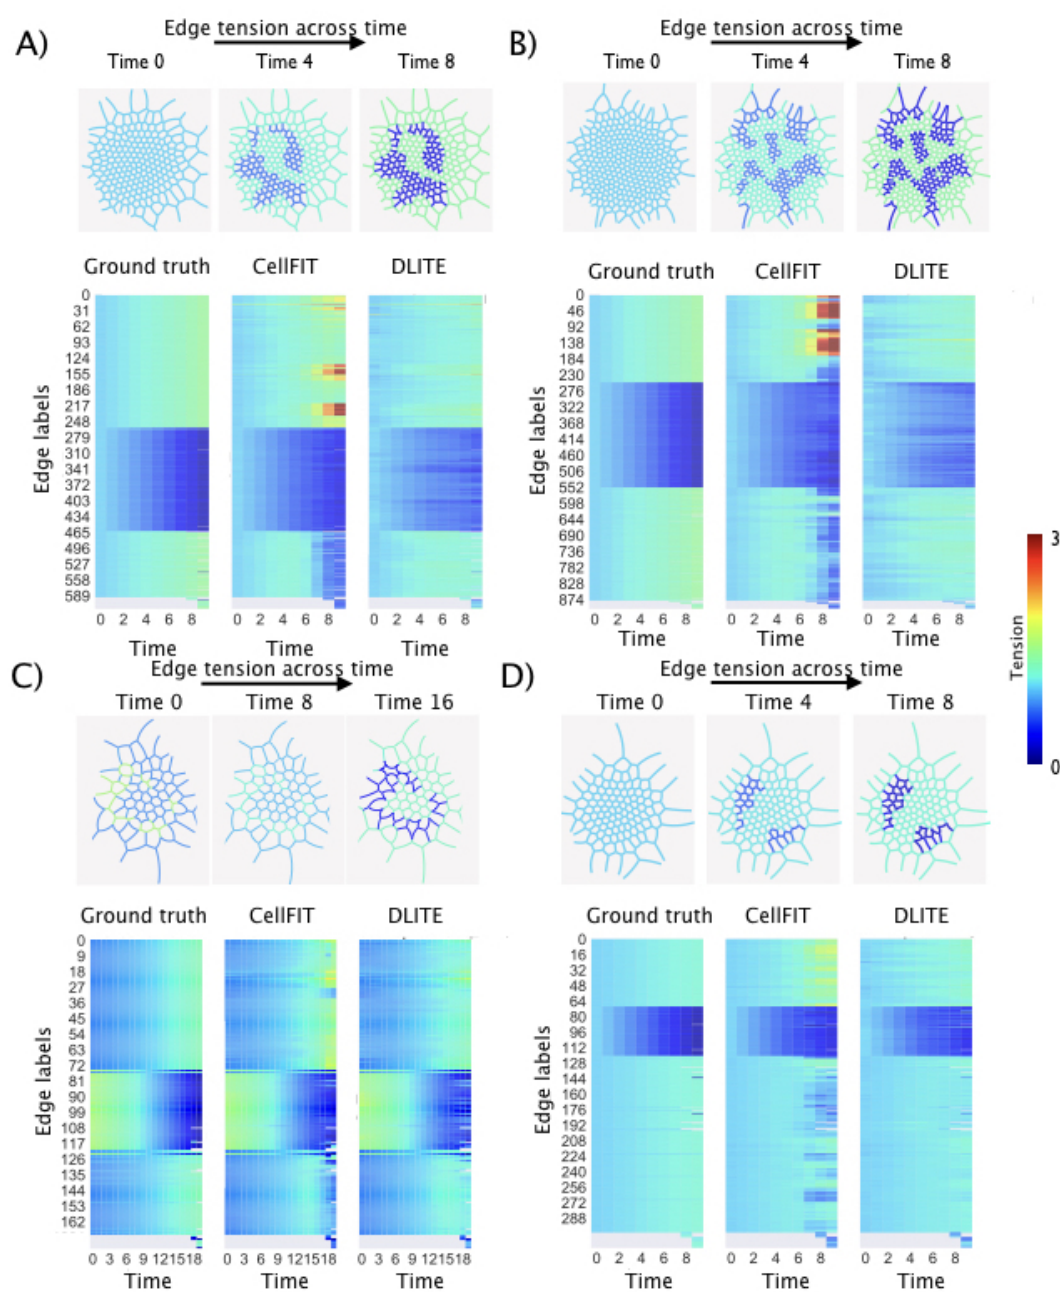



## Dynamic tension estimation

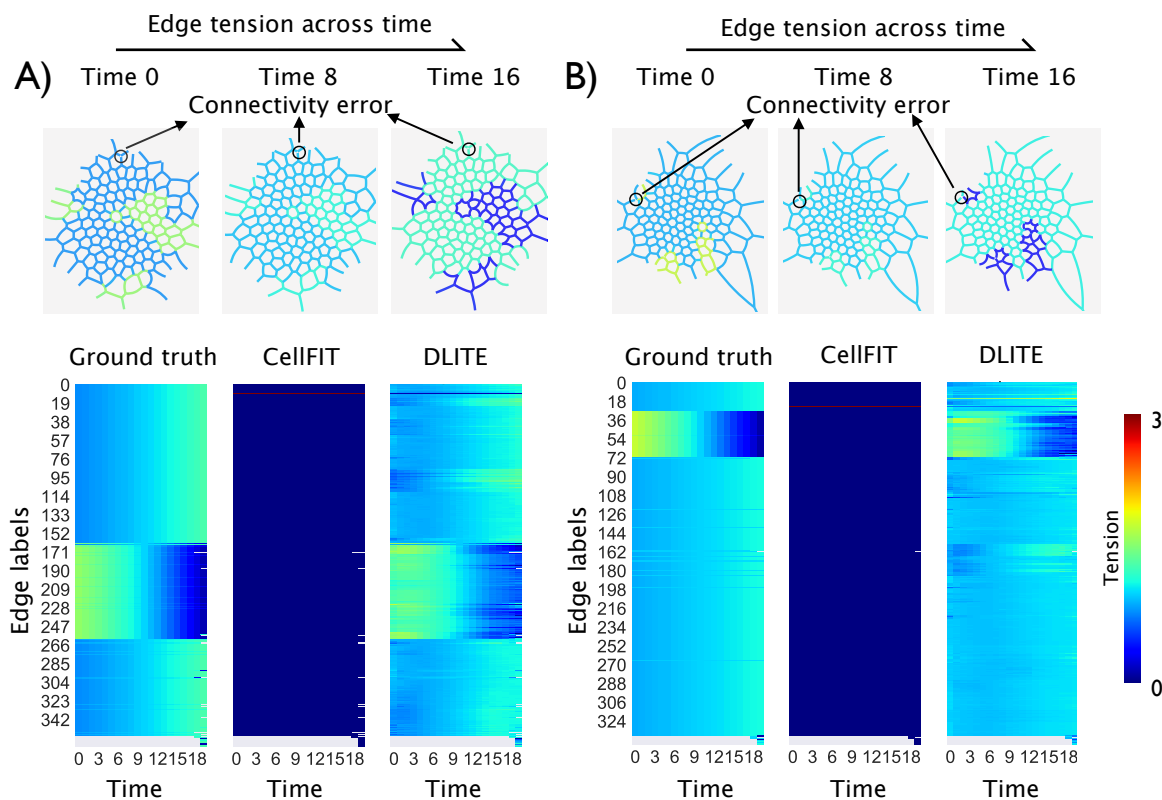

Figure S6: Two example time-series (A, B) of colony rearrangements with single connectivity errors at a node. Average edge tension is normalized to 1 at every time point. Shown - 3 example time points (Time 0, 8 and 16) and heatmaps of dynamic edge tensions for ground truth, CellFIT and DLITE. (A) DLITE -  $r = 0.88$ , CellFIT -  $r = 0.22$ , (B) DLITE -  $r = 0.83$ , CellFIT -  $r = 0.25$ .

## Dynamic tension estimation

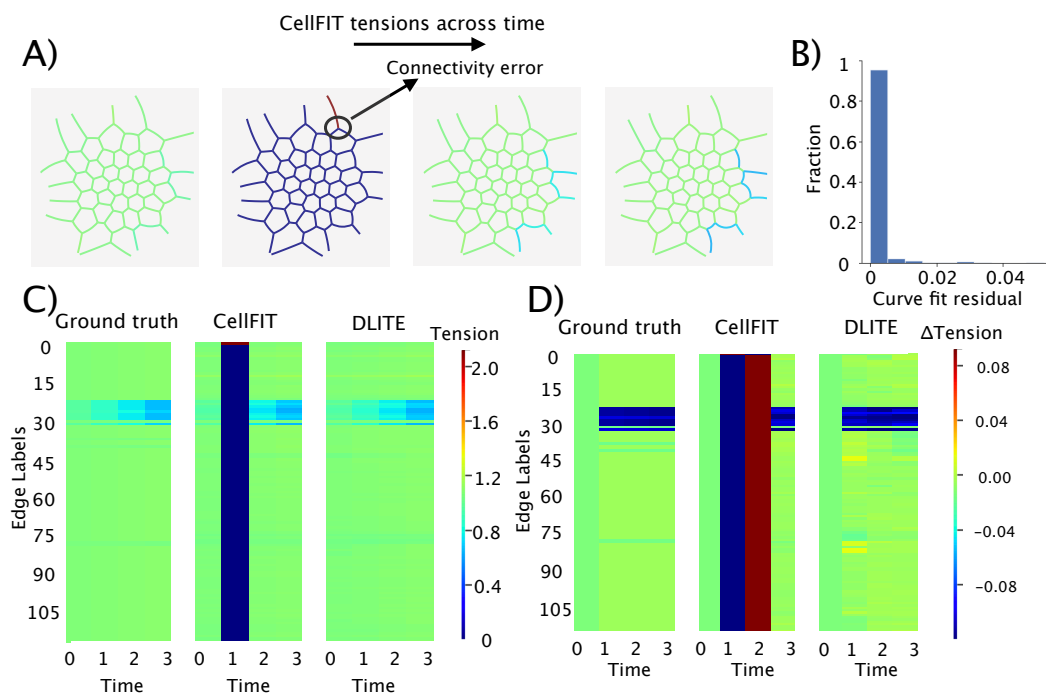

Figure S7: Synthetic colony time-series with a single connectivity error at time point 1. (A) Time-series of colony edge tensions predicted using CellFIT. (B) Histogram of curve fit residuals at all time points. (C) Heatmap of dynamic edge tensions for ground truth, CellFIT and DLITE. (D) Heatmap of  $\Delta$ Tension (derivative of tension) for ground truth, CellFIT and DLITE.

## Dynamic tension estimation

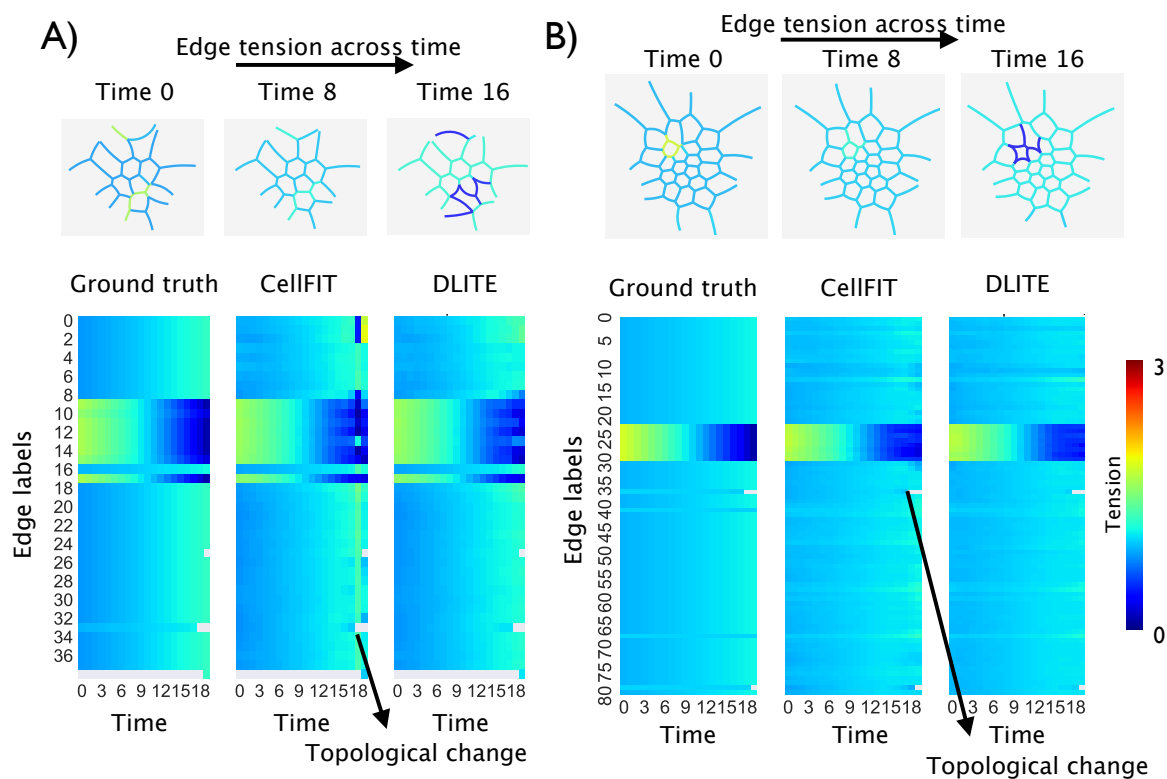

Figure S8: Two example time-series (A, B) of colony rearrangements with single topological changes (shrinkage of cell-cell junctions) at a node. Average edge tension is normalized to 1 at every time point. Shown - 3 example time points (Time 0, 8 and 16) and heatmaps of dynamic edge tensions for ground truth, CellFIT and DLITE. (A) DLITE -  $r = 0.97$ , CellFIT -  $r = 0.91$ , (B) DLITE -  $r = 0.975$ , CellFIT -  $r = 0.974$ .

## Dynamic tension estimation

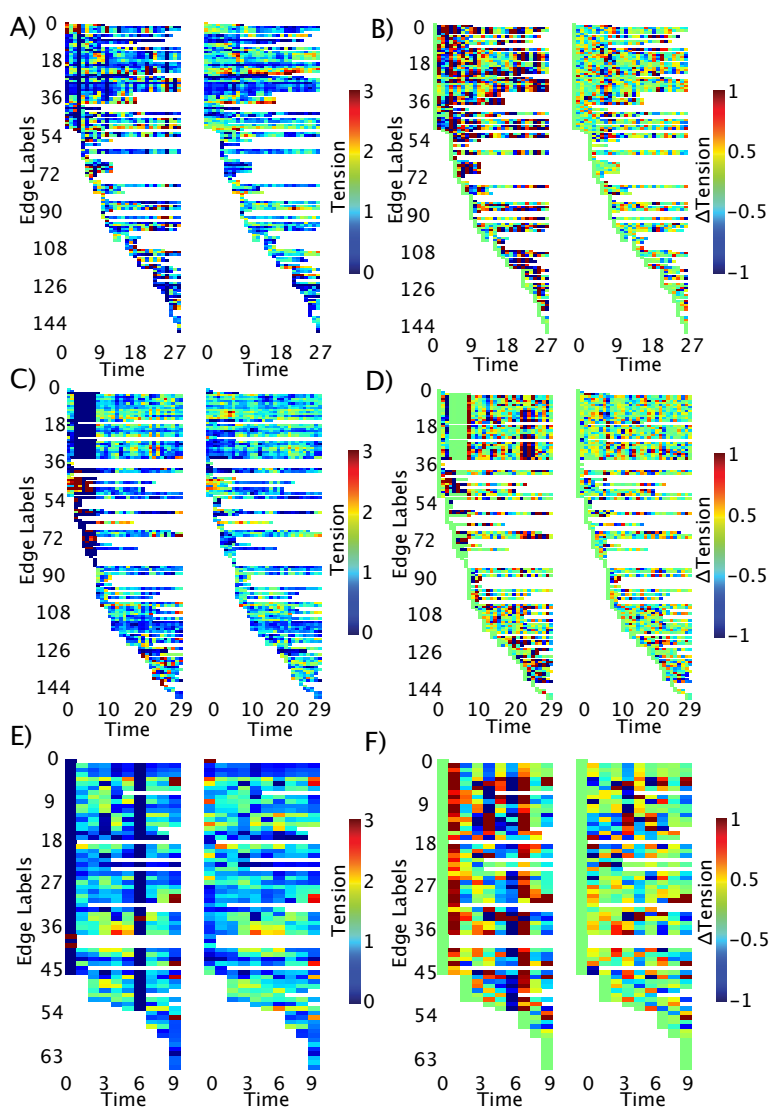

Figure S9: Heatmaps of dynamic edge tension (A, C, E) and dynamic change (derivative of tension) in edge tension (B, D, F) for the ZO-1 time-series shown in Fig. 6A, 6B and 6C respectively.

## Dynamic tension estimation

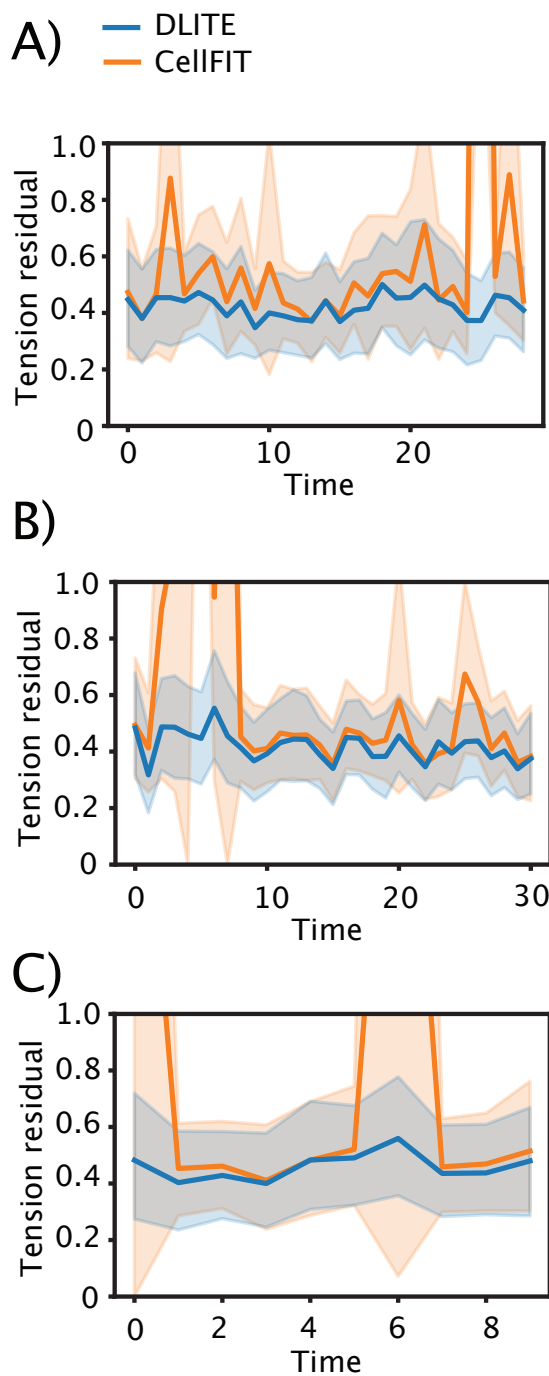

Figure S10: Lineplots (A, B, C) of tension residuals showing an estimate of the central tendency and a confidence interval for that estimate for the ZO-1 time-series shown in Fig. 6A, 6B and 6C respectively.

441 **References**

- 442 [1] N. Heck and R. Benavides-Piccione. Dendritic spines: from shape to function. *Frontiers in*  
443 *neuroanatomy*, 9:101, 2015.
- 444 [2] N. D. Evans, C. Minelli, E. Gentleman, V. LaPointe, S. N. Patankar, M. Kallivretaki, X. Chen,  
445 C. J. Roberts, and M. M. Stevens. Substrate stiffness affects early differentiation events in em-  
446 bryonic stem cells. *Eur cell mater*, 18(1):e13, 2009.
- 447 [3] J. J. Paulin, P. Haslehurst, A. D. Fellows, W. Liu, J. D. Jackson, Z. Joel, D. M. Cummings,  
448 and F. A. Edwards. Large and small dendritic spines serve different interacting functions in  
449 hippocampal synaptic plasticity and homeostasis. *Neural plasticity*, 2016, 2016.
- 450 [4] M. M. Stevens and J. H. George. Exploring and engineering the cell surface interface. *Science*,  
451 310(5751):1135–1138, 2005.
- 452 [5] R. C. Calizo, A. Ron, M. Hu, S. Bhattacharya, W. G. Janssen, J. Hone, S. Scarlata, P. Rangamani,  
453 and R. Iyengar. Cell shape regulates subcellular organelle location to control short-term  $ca^{2+}$   
454 signal dynamics in vsmc. *bioRxiv*, page 161950, 2018.
- 455 [6] A. Ron, E. U. Azeloglu, R. C. Calizo, M. Hu, S. Bhattacharya, Y. Chen, G. Jayaraman, S. Lee,  
456 S. R. Neves-Zaph, H. Li, et al. Cell shape information is transduced through tension-independent  
457 mechanisms. *Nature communications*, 8(1):2145, 2017.
- 458 [7] M. Hu, E. U. Azeloglu, A. Ron, K.-H. Tran-Ba, R. C. Calizo, I. Tavassoly, S. Bhattacharya,  
459 G. Jayaraman, Y. Chen, V. Rabinovich, et al. A biomimetic gelatin-based platform elicits a pro-  
460 differentiation effect on podocytes through mechanotransduction. *Scientific Reports*, 7:43934,  
461 2017.
- 462 [8] R. Vasan, M. Akamatsu, J. Schöneberg, and P. Rangamani. Intracellular membrane trafficking:  
463 Modeling local movements in cells. In *Cell Movement*, pages 259–301. Springer, 2018.
- 464 [9] A. Brugués, E. Anon, V. Conte, J. H. Veldhuis, M. Gupta, J. Colombelli, J. J. Muñoz, G. W.  
465 Brodland, B. Ladoux, and X. Trepat. Forces driving epithelial wound healing. *Nature physics*,  
466 10(9):683, 2014.

- 467 [10] R. Sunyer, V. Conte, J. Escribano, A. Elosegui-Artola, A. Labernadie, L. Valon, D. Navajas,  
468 J. M. García-Aznar, J. J. Muñoz, P. Roca-Cusachs, et al. Collective cell durotaxis emerges from  
469 long-range intercellular force transmission. *Science*, 353(6304):1157–1161, 2016.
- 470 [11] X. Serra-Picamal, V. Conte, R. Vincent, E. Anon, D. T. Tambe, E. Bazellieres, J. P. Butler, J. J.  
471 Fredberg, and X. Trepap. Mechanical waves during tissue expansion. *Nature Physics*, 8(8):628,  
472 2012.
- 473 [12] O. Du Roure, A. Saez, A. Buguin, R. H. Austin, P. Chavrier, P. Siberzan, and B. Ladoux.  
474 Force mapping in epithelial cell migration. *Proceedings of the National Academy of Sciences*,  
475 102(7):2390–2395, 2005.
- 476 [13] A. Ray, O. Lee, Z. Win, R. M. Edwards, P. W. Alford, D.-H. Kim, and P. P. Provenzano.  
477 Anisotropic forces from spatially constrained focal adhesions mediate contact guidance directed  
478 cell migration. *Nature Communications*, 8:14923, 2017.
- 479 [14] A. Labernadie, T. Kato, A. Brugués, X. Serra-Picamal, S. Derzsi, E. Arwert, A. Weston,  
480 V. González-Tarragó, A. Elosegui-Artola, L. Albertazzi, et al. A mechanically active heterotypic  
481 e-cadherin/n-cadherin adhesion enables fibroblasts to drive cancer cell invasion. *Nature cell*  
482 *biology*, 19(3):224, 2017.
- 483 [15] A. Diz-Muñoz, D. A. Fletcher, and O. D. Weiner. Use the force: membrane tension as an  
484 organizer of cell shape and motility. *Trends in cell biology*, 23(2):47–53, 2013.
- 485 [16] T. S. Malinova and S. Huveneers. Sensing of cytoskeletal forces by asymmetric adherens junc-  
486 tions. *Trends in cell biology*, 28(4):328–341, 2018.
- 487 [17] O. Tornavaca, M. Chia, N. Dufton, L. O. Almagro, D. E. Conway, A. M. Randi, M. A. Schwartz,  
488 K. Matter, and M. S. Balda. Zo-1 controls endothelial adherens junctions, cell–cell tension,  
489 angiogenesis, and barrier formation. *J Cell Biol*, pages jcb–201404140, 2015.
- 490 [18] T. Yano, H. Kanoh, A. Tamura, and S. Tsukita. Apical cytoskeletons and junctional complexes  
491 as a combined system in epithelial cell sheets. *Annals of the New York Academy of Sciences*,  
492 1405(1):32–43, 2017.

- 493 [19] N. Borghi and W. J. Nelson. Intercellular adhesion in morphogenesis: molecular and biophysical  
494 considerations. *Current topics in developmental biology*, 89:1–32, 2009.
- 495 [20] Y.-S. Chu, W. A. Thomas, O. Eder, F. Pincet, E. Perez, J. P. Thiery, and S. Dufour. Force  
496 measurements in e-cadherin–mediated cell doublets reveal rapid adhesion strengthened by actin  
497 cytoskeleton remodeling through rac and cdc42. *J Cell Biol*, 167(6):1183–1194, 2004.
- 498 [21] X. Trepant and J. J. Fredberg. Plithotaxis and emergent dynamics in collective cellular migration.  
499 *Trends in cell biology*, 21(11):638–646, 2011.
- 500 [22] D. E. Leckband, Q. le Duc, N. Wang, and J. de Rooij. Mechanotransduction at cadherin-mediated  
501 adhesions. *Current opinion in cell biology*, 23(5):523–530, 2011.
- 502 [23] J. Rosenblatt, M. C. Raff, and L. P. Cramer. An epithelial cell destined for apoptosis signals  
503 its neighbors to extrude it by an actin-and myosin-dependent mechanism. *Current biology*,  
504 11(23):1847–1857, 2001.
- 505 [24] F. Pilot and T. Lecuit. Compartmentalized morphogenesis in epithelia: from cell to tissue shape.  
506 *Developmental dynamics: an official publication of the American Association of Anatomists*,  
507 232(3):685–694, 2005.
- 508 [25] W. J. Polacheck and C. S. Chen. Measuring cell-generated forces: a guide to the available tools.  
509 *Nature methods*, 13(5):415, 2016.
- 510 [26] Y. F. Dufrêne, T. Ando, R. Garcia, D. Alsteens, D. Martinez-Martin, A. Engel, C. Gerber, and  
511 D. J. Müller. Imaging modes of atomic force microscopy for application in molecular and cell  
512 biology. *Nature nanotechnology*, 12(4):295, 2017.
- 513 [27] B. Hogan, A. Babataheri, Y. Hwang, A. I. Barakat, and J. Husson. Characterizing cell adhesion  
514 by using micropipette aspiration. *Biophysical journal*, 109(2):209–219, 2015.
- 515 [28] A. Diz-Muñoz, K. Thurley, S. Chintamen, S. J. Altschuler, L. F. Wu, D. A. Fletcher, and O. D.  
516 Weiner. Membrane tension acts through pld2 and mtorc2 to limit actin network assembly during  
517 neutrophil migration. *PLoS biology*, 14(6):e1002474, 2016.
- 518 [29] J. Dai and M. P. Sheetz. Membrane tether formation from blebbing cells. *Biophysical journal*,  
519 77(6):3363–3370, 1999.



- 520 [30] A. Colom, E. Derivery, S. Soleimanpour, C. Tomba, M. Dal Molin, N. Sakai, M. González-  
521 Gaitán, S. Matile, and A. Roux. A fluorescent membrane tension probe. *Nature chemistry*,  
522 10(11):1118, 2018.
- 523 [31] C. Gayrard and N. Borghi. Fret-based molecular tension microscopy. *Methods*, 94:33–42, 2016.
- 524 [32] C. Grashoff, B. D. Hoffman, M. D. Brenner, R. Zhou, M. Parsons, M. T. Yang, M. A. McLean,  
525 S. G. Sligar, C. S. Chen, T. Ha, et al. Measuring mechanical tension across vinculin reveals  
526 regulation of focal adhesion dynamics. *Nature*, 466(7303):263, 2010.
- 527 [33] K. Sugimura, P.-F. Lenne, and F. Graner. Measuring forces and stresses in situ in living tissues.  
528 *Development*, 143(2):186–196, 2016.
- 529 [34] G. W. Brodland, J. H. Veldhuis, S. Kim, M. Perrone, D. Mashburn, and M. S. Hutson. Cellfit: a  
530 cellular force-inference toolkit using curvilinear cell boundaries. *PloS one*, 9(6):e99116, 2014.
- 531 [35] S. Ishihara and K. Sugimura. Bayesian inference of force dynamics during morphogenesis.  
532 *Journal of theoretical biology*, 313:201–211, 2012.
- 533 [36] J. H. Veldhuis, A. Ehsandar, J.-L. Maître, T. Hiragi, S. Cox, and G. W. Brodland. Inferring  
534 cellular forces from image stacks. *Phil. Trans. R. Soc. B*, 372(1720):20160261, 2017.
- 535 [37] S. Alt, P. Ganguly, and G. Salbreux. Vertex models: from cell mechanics to tissue  
536 morphogenesis. *Philosophical Transactions of the Royal Society B: Biological Sciences*,  
537 372(1720):20150520, 2017.
- 538 [38] T. M. Fruchterman and E. M. Reingold. Graph drawing by force-directed placement. *Software:*  
539 *Practice and experience*, 21(11):1129–1164, 1991.
- 540 [39] A. Beck and A. Ben-Tal. On the solution of the tikhonov regularization of the total least squares  
541 problem. *SIAM Journal on Optimization*, 17(1):98–118, 2006.
- 542 [40] E. Jones, T. Oliphant, and P. Peterson. {SciPy}: open source scientific tools for {Python}. 2014.
- 543 [41] A. Blelly, M. Felipe-Gomes, A. Auger, and D. Brockhoff. Stopping criteria, initialization, and  
544 implementations of bfgs and their effect on the bbob test suite. In *GECCO'18 Companion*, 2018.

- 545 [42] P. J. Albert and U. S. Schwarz. Dynamics of cell shape and forces on micropatterned substrates  
546 predicted by a cellular potts model. *Biophysical journal*, 106(11):2340–2352, 2014.
- 547 [43] F. Graner and J. A. Glazier. Simulation of biological cell sorting using a two-dimensional ex-  
548 tended potts model. *Physical review letters*, 69(13):2013, 1992.
- 549 [44] T. Nagai and H. Honda. A dynamic cell model for the formation of epithelial tissues. *Philosophical Magazine B*, 81(7):699–719, 2001.
- 551 [45] T. Nagai and H. Honda. Computer simulation of wound closure in epithelial tissues: Cell–basal-  
552 lamina adhesion. *Physical Review E*, 80(6):061903, 2009.
- 553 [46] G. W. Brodland, D. Viens, and J. H. Veldhuis. A new cell-based fe model for the mechan-  
554 ics of embryonic epithelia. *Computer methods in biomechanics and biomedical engineering*,  
555 10(2):121–128, 2007.
- 556 [47] H. H. Chen and G. W. Brodland. Cell-level finite element studies of viscous cells in planar ag-  
557 gregates. *TRANSACTIONS-AMERICAN SOCIETY OF MECHANICAL ENGINEERS JOURNAL*  
558 *OF BIOMECHANICAL ENGINEERING*, 122(4):394–401, 2000.
- 559 [48] J. A. Fozard, M. Lucas, J. R. King, and O. E. Jensen. Vertex-element models for anisotropic  
560 growth of elongated plant organs. *Frontiers in plant science*, 4:233, 2013.
- 561 [49] K. A. Brakke. The surface evolver. *Experimental mathematics*, 1(2):141–165, 1992.
- 562 [50] D. Debnath, J. S. Gainer, D. Kim, and K. T. Matchev. Edge detecting new physics the voronoi  
563 way. *EPL (Europhysics Letters)*, 114(4):41001, 2016.
- 564 [51] C. McQuin, A. Goodman, V. Chernyshev, L. Kametsky, B. A. Cimini, K. W. Karhohs, M. Doan,  
565 L. Ding, S. M. Rafelski, D. Thirstrup, et al. Cellprofiler 3.0: Next-generation image processing  
566 for biology. *PLoS biology*, 16(7):e2005970, 2018.
- 567 [52] S. Stylianidou, C. Brennan, S. B. Nissen, N. J. Kuwada, and P. A. Wiggins. Supersegger: robust  
568 image segmentation, analysis and lineage tracking of bacterial cells. *Molecular microbiology*,  
569 102(4):690–700, 2016.
- 570 [53] Y. LeCun, Y. Bengio, and G. Hinton. Deep learning. *nature*, 521(7553):436, 2015.

- 571 [54] C. Ounkomol, S. Seshamani, M. M. Maleckar, F. Collman, and G. Johnson. Label-free prediction  
572 of three-dimensional fluorescence images from transmitted light microscopy. *bioRxiv*, 2018.
- 573 [55] D. Attali and A. Montanvert. Computing and simplifying 2d and 3d continuous skeletons. *Com-*  
574 *puter vision and image understanding*, 67(3):261–273, 1997.
- 575 [56] D. Kudelski, J.-L. Mari, and S. Viseur. 3d feature line detection based on vertex labeling and  
576 2d skeletonization. In *Shape Modeling International Conference (SMI), 2010*, pages 246–250.  
577 IEEE, 2010.
- 578 [57] B. Blonder, T. W. Wey, A. Dornhaus, R. James, and A. Sih. Temporal dynamics and network  
579 analysis. *Methods in Ecology and Evolution*, 3(6):958–972, 2012.
- 580 [58] S. T. Holgate. The airway epithelium is central to the pathogenesis of asthma. *Allergology*  
581 *International*, 57(1):1–10, 2008.
- 582 [59] G. Meng, J. Zhao, H.-M. Wang, R.-G. Ding, X.-C. Zhang, C.-Q. Huang, and J.-X. Ruan. In-  
583 jury of cell tight junctions and changes of actin level in acute lung injury caused by the per-  
584 fluoroisobutylene exposure and the role of myosin light chain kinase. *Journal of occupational*  
585 *health*, 53(4):250–257, 2011.
- 586 [60] W. E. Smoyer and P. Mundel. Regulation of podocyte structure during the development of  
587 nephrotic syndrome. *Journal of molecular medicine*, 76(3-4):172–183, 1998.
- 588 [61] L. J. Rizzolo, S. Peng, Y. Luo, and W. Xiao. Integration of tight junctions and claudins with  
589 the barrier functions of the retinal pigment epithelium. *Progress in retinal and eye research*,  
590 30(5):296–323, 2011.
- 591 [62] W. Fries, E. Mazzon, S. Souarzoni, and A. Martin. Permeability in the rat. *Laboratory investi-*  
592 *gation*, 79(1):49, 1999.
- 593 [63] R.-M. Mège, J. Gavard, and M. Lambert. Regulation of cell–cell junctions by the cytoskeleton.  
594 *Current opinion in cell biology*, 18(5):541–548, 2006.
- 595 [64] V. Vasioukhin and E. Fuchs. Actin dynamics and cell–cell adhesion in epithelia. *Current opinion*  
596 *in cell biology*, 13(1):76–84, 2001.

- 597 [65] S. Tsukita, M. Furuse, and M. Itoh. Structural and signalling molecules come together at tight  
598 junctions. *Current opinion in cell biology*, 11(5):628–633, 1999.
- 599 [66] R. Stephenson. Break, flare, repair: Rho flares locally reinforce the tight junction barrier. 2018.
- 600 [67] A. Hagberg, P. Swart, and D. S Chult. Exploring network structure, dynamics, and function  
601 using networkx. Technical report, Los Alamos National Lab.(LANL), Los Alamos, NM (United  
602 States), 2008.
